# Supplementary material for: Extreme Temperature Events in Serbia in Relation to Atmospheric Circulation
Source: MDPI journal article supplement (doi:10.3390/atmos12121584), 2021-11-29
Supplement: s1 [file s1]

# Supplementary Materials: Extreme Temperature Events in Serbia in Relation to Atmospheric Circulation

Ivana Tošić \*, Suzana Putniković, Milica Tošić and Irida Lazić

**Table S1.** Seasonal trend coefficients of Tn for 11 stations (listed in Table 1) in Serbia from 1949 to 2018.

| Abb | Spring        | Summer        | Autumn  | Winter  |
|-----|---------------|---------------|---------|---------|
| ZR  | 0.0442        | 0.0170        | 0.0205  | 0.0309  |
| NS  | 0.0315        | 0.0124        | 0.0112  | 0.0415  |
| SM  | 0.0086        | −0.0024       | 0.0107  | −0.0156 |
| BG  | <b>0.0470</b> | <b>0.0267</b> | 0.0194  | 0.0287  |
| VG  | 0.0074        | −0.0127       | 0.0003  | 0.0077  |
| LO  | 0.0343        | <b>0.0292</b> | 0.0317  | 0.0540  |
| SP  | 0.0346        | 0.0179        | 0.0110  | 0.0168  |
| NE  | <b>0.0758</b> | <b>0.0266</b> | 0.0178  | 0.0255  |
| KG  | 0.0425        | <b>0.0227</b> | −0.0084 | −0.0032 |
| KV  | 0.0318        | <b>0.0225</b> | 0.0068  | 0.0321  |
| NI  | 0.0308        | <b>0.0224</b> | 0.0073  | 0.0075  |

<sup>1</sup> Coefficients being significant at the 5 % level are indicated by bold.

**Table S2.** Seasonal trend coefficients of Tx for 11 stations (listed in Table 1) in Serbia from 1949 to 2018.

| Abb | Spring        | Summer        | Autumn  | Winter        |
|-----|---------------|---------------|---------|---------------|
| ZR  | 0.0142        | 0.0253        | 0.0117  | <b>0.0386</b> |
| NS  | −0.0125       | −0.0068       | −0.0127 | 0.0273        |
| SM  | 0.0201        | <b>0.0227</b> | 0.0154  | 0.0203        |
| BG  | <b>0.0226</b> | <b>0.0336</b> | 0.0173  | <b>0.0370</b> |
| VG  | 0.0105        | <b>0.0321</b> | 0.0083  | 0.0367        |
| LO  | <b>0.0271</b> | 0.0235        | 0.0263  | <b>0.0426</b> |
| SP  | 0.0153        | <b>0.0450</b> | 0.0201  | <b>0.0468</b> |
| NE  | 0.0135        | 0.0220        | 0.0010  | <b>0.0462</b> |
| KG  | 0.0149        | 0.0336        | 0.0162  | <b>0.0446</b> |
| KV  | 0.0043        | 0.0282        | 0.0037  | 0.0262        |
| NI  | 0.0115        | 0.0221        | 0.0051  | 0.0316        |

<sup>1</sup> Coefficients being significant at the 5 % level are indicated by bold.

**Table S3. 1.** Absolute and average number (avg) of SU (days) for 11 stations in spring in Serbia from 1949 to 2018.

|      | BG | KG | KV | NE | LO | NI | NS | SP | SM | VG | ZR | avg   |
|------|----|----|----|----|----|----|----|----|----|----|----|-------|
| 1949 | 14 | 14 | 13 | 16 | 15 | 23 | 16 | 17 | 16 | 23 | 16 | 16.64 |
| 1950 | 15 | 18 | 17 | 20 | 18 | 18 | 14 | 16 | 15 | 20 | 16 | 17.00 |
| 1951 | 8  | 11 | 9  | 13 | 10 | 17 | 10 | 13 | 14 | 13 | 9  | 11.55 |
| 1952 | 24 | 22 | 24 | 17 | 29 | 29 | 25 | 27 | 29 | 27 | 24 | 25.18 |
| 1953 | 8  | 8  | 9  | 6  | 8  | 6  | 9  | 7  | 9  | 7  | 9  | 7.82  |
| 1954 | 4  | 5  | 3  | 9  | 3  | 4  | 7  | 4  | 4  | 6  | 5  | 4.91  |
| 1955 | 10 | 12 | 12 | 17 | 11 | 14 | 13 | 11 | 10 | 10 | 9  | 11.73 |
| 1956 | 9  | 5  | 10 | 8  | 11 | 10 | 10 | 9  | 12 | 6  | 8  | 8.91  |
| 1957 | 4  | 6  | 5  | 9  | 3  | 8  | 5  | 5  | 5  | 4  | 4  | 5.27  |
| 1958 | 18 | 16 | 16 | 20 | 16 | 16 | 19 | 15 | 17 | 19 | 22 | 17.64 |
| 1959 | 3  | 3  | 4  | 6  | 6  | 7  | 4  | 5  | 4  | 5  | 7  | 4.91  |
| 1960 | 5  | 5  | 6  | 8  | 5  | 6  | 5  | 5  | 5  | 4  | 6  | 5.45  |
| 1961 | 10 | 13 | 15 | 12 | 12 | 15 | 10 | 10 | 11 | 11 | 25 | 13.09 |
| 1962 | 23 | 18 | 18 | 19 | 20 | 21 | 20 | 18 | 19 | 19 | 24 | 19.91 |
| 1963 | 10 | 7  | 4  | 12 | 8  | 10 | 11 | 9  | 10 | 11 | 17 | 9.91  |
| 1964 | 3  | 1  | 1  | 4  | 2  | 4  | 3  | 3  | 3  | 4  | 6  | 3.09  |
| 1965 | 6  | 4  | 7  | 8  | 5  | 10 | 4  | 5  | 4  | 6  | 5  | 5.82  |
| 1966 | 9  | 7  | 9  | 11 | 9  | 9  | 7  | 8  | 8  | 8  | 10 | 8.64  |
| 1967 | 10 | 5  | 7  | 8  | 8  | 11 | 9  | 8  | 10 | 6  | 4  | 7.82  |
| 1968 | 22 | 25 | 25 | 25 | 27 | 29 | 21 | 27 | 23 | 24 | 20 | 24.36 |
| 1969 | 26 | 20 | 24 | 19 | 22 | 23 | 24 | 22 | 24 | 21 | 20 | 22.27 |
| 1970 | 7  | 8  | 9  | 10 | 7  | 13 | 6  | 7  | 7  | 7  | 2  | 7.55  |
| 1971 | 18 | 15 | 17 | 21 | 16 | 24 | 18 | 17 | 18 | 19 | 16 | 18.09 |
| 1972 | 12 | 13 | 13 | 14 | 11 | 15 | 11 | 11 | 12 | 12 | 13 | 12.45 |
| 1973 | 16 | 13 | 13 | 14 | 16 | 14 | 17 | 14 | 17 | 16 | 15 | 15.00 |
| 1974 | 7  | 5  | 4  | 6  | 10 | 6  | 7  | 4  | 8  | 5  | 2  | 5.82  |
| 1975 | 16 | 12 | 14 | 15 | 15 | 16 | 17 | 11 | 16 | 14 | 13 | 14.45 |
| 1976 | 11 | 9  | 11 | 10 | 12 | 15 | 12 | 7  | 15 | 8  | 6  | 10.55 |
| 1977 | 14 | 14 | 17 | 14 | 17 | 20 | 15 | 15 | 16 | 13 | 11 | 15.09 |
| 1978 | 2  | 2  | 2  | 2  | 5  | 3  | 1  | 2  | 1  | 0  | 0  | 1.82  |
| 1979 | 13 | 14 | 13 | 14 | 14 | 15 | 14 | 14 | 14 | 14 | 13 | 13.82 |
| 1980 | 2  | 1  | 0  | 1  | 2  | 2  | 1  | 1  | 2  | 0  | 2  | 1.27  |
| 1981 | 7  | 5  | 5  | 6  | 9  | 7  | 6  | 4  | 6  | 6  | 6  | 6.09  |
| 1982 | 15 | 16 | 14 | 11 | 17 | 15 | 13 | 15 | 14 | 17 | 12 | 14.45 |
| 1983 | 22 | 24 | 25 | 25 | 27 | 28 | 21 | 22 | 23 | 22 | 24 | 23.91 |
| 1984 | 6  | 7  | 9  | 8  | 9  | 13 | 5  | 8  | 6  | 7  | 5  | 7.55  |
| 1985 | 17 | 20 | 22 | 26 | 19 | 26 | 15 | 17 | 18 | 19 | 12 | 19.18 |
| 1986 | 22 | 24 | 24 | 17 | 31 | 27 | 22 | 23 | 28 | 25 | 26 | 24.45 |
| 1987 | 2  | 2  | 9  | 2  | 6  | 7  | 1  | 1  | 3  | 3  | 4  | 3.64  |
| 1988 | 12 | 9  | 7  | 9  | 9  | 11 | 10 | 10 | 10 | 10 | 9  | 9.64  |
| 1989 | 12 | 11 | 10 | 9  | 11 | 14 | 10 | 10 | 13 | 7  | 9  | 10.55 |
| 1990 | 16 | 11 | 9  | 14 | 12 | 9  | 14 | 12 | 14 | 13 | 12 | 12.36 |
| 1991 | 3  | 3  | 2  | 1  | 3  | 3  | 3  | 3  | 3  | 1  | 2  | 2.45  |
| 1992 | 15 | 7  | 6  | 13 | 14 | 9  | 15 | 12 | 11 | 15 | 17 | 12.18 |
| 1993 | 20 | 13 | 12 | 15 | 21 | 15 | 20 | 17 | 18 | 19 | 18 | 17.09 |
| 1994 | 17 | 17 | 14 | 18 | 18 | 20 | 11 | 19 | 16 | 15 | 13 | 16.18 |
| 1995 | 17 | 14 | 13 | 13 | 15 | 12 | 14 | 13 | 18 | 13 | 13 | 14.09 |
| 1996 | 17 | 15 | 16 | 20 | 13 | 20 | 11 | 16 | 19 | 18 | 12 | 16.09 |

|            |       |       |       |       |       |       |       |       |       |       |       |       |
|------------|-------|-------|-------|-------|-------|-------|-------|-------|-------|-------|-------|-------|
| 1997       | 17    | 17    | 17    | 18    | 17    | 18    | 15    | 17    | 17    | 17    | 15    | 16.82 |
| 1998       | 11    | 9     | 8     | 11    | 9     | 9     | 9     | 9     | 12    | 11    | 10    | 9.82  |
| 1999       | 11    | 9     | 12    | 13    | 13    | 16    | 8     | 12    | 12    | 12    | 7     | 11.36 |
| 2000       | 30    | 31    | 24    | 25    | 24    | 27    | 28    | 27    | 27    | 29    | 29    | 27.36 |
| 2001       | 17    | 15    | 15    | 11    | 18    | 20    | 17    | 15    | 17    | 13    | 15    | 15.73 |
| 2002       | 21    | 15    | 11    | 23    | 13    | 16    | 15    | 16    | 16    | 20    | 21    | 17.00 |
| 2003       | 26    | 23    | 23    | 24    | 25    | 24    | 24    | 24    | 25    | 25    | 24    | 24.27 |
| 2004       | 6     | 7     | 3     | 7     | 6     | 13    | 3     | 3     | 6     | 5     | 4     | 5.73  |
| 2005       | 13    | 12    | 11    | 13    | 14    | 14    | 12    | 12    | 13    | 10    | 11    | 12.27 |
| 2006       | 12    | 15    | 10    | 13    | 15    | 17    | 7     | 12    | 16    | 12    | 9     | 12.55 |
| 2007       | 16    | 15    | 13    | 19    | 16    | 20    | 16    | 15    | 17    | 13    | 16    | 16.00 |
| 2008       | 17    | 16    | 16    | 14    | 15    | 19    | 15    | 15    | 16    | 15    | 17    | 15.91 |
| 2009       | 21    | 18    | 19    | 20    | 22    | 19    | 21    | 21    | 22    | 23    | 20    | 20.55 |
| 2010       | 13    | 13    | 12    | 13    | 16    | 15    | 12    | 12    | 14    | 13    | 13    | 13.27 |
| 2011       | 15    | 12    | 11    | 14    | 14    | 13    | 0     | 14    | 14    | 17    | 16    | 12.73 |
| 2012       | 19    | 16    | 15    | 25    | 19    | 17    | 0     | 18    | 17    | 19    | 18    | 16.64 |
| 2013       | 22    | 22    | 22    | 26    | 20    | 24    | 5     | 24    | 22    | 22    | 21    | 20.91 |
| 2014       | 11    | 9     | 10    | 11    | 10    | 11    | 0     | 10    | 9     | 11    | 9     | 9.18  |
| 2015       | 15    | 14    | 12    | 22    | 14    | 20    | 14    | 18    | 16    | 17    | 15    | 16.09 |
| 2016       | 18    | 17    | 15    | 18    | 18    | 18    | 18    | 18    | 19    | 17    | 17    | 17.55 |
| 2017       | 13    | 13    | 10    | 10    | 13    | 15    | 12    | 16    | 12    | 15    | 18    | 13.36 |
| 2018       | 34    | 33    | 35    | 36    | 33    | 41    | 37    | 36    | 34    | 33    | 35    | 35.18 |
| <b>avg</b> | 13.67 | 12.57 | 12.46 | 14.01 | 13.87 | 15.36 | 12.06 | 13.04 | 13.87 | 13.44 | 13.04 |       |

**Table S3. 2.** Absolute and average number (avg) of SU (days) for 11 stations in summer in Serbia from 1949 to 2018.

|      | BG | KG | KV | NE | LO | NI | NS | SP | SM | VG | ZR | avg   |
|------|----|----|----|----|----|----|----|----|----|----|----|-------|
| 1949 | 48 | 47 | 46 | 55 | 45 | 52 | 52 | 50 | 52 | 51 | 48 | 49.64 |
| 1950 | 84 | 85 | 85 | 84 | 81 | 88 | 83 | 85 | 84 | 85 | 86 | 84.55 |
| 1951 | 59 | 61 | 65 | 75 | 60 | 83 | 64 | 64 | 70 | 64 | 70 | 66.82 |
| 1952 | 77 | 77 | 77 | 82 | 75 | 83 | 78 | 78 | 81 | 76 | 80 | 78.55 |
| 1953 | 72 | 72 | 71 | 79 | 62 | 74 | 68 | 73 | 70 | 78 | 70 | 71.73 |
| 1954 | 63 | 68 | 73 | 80 | 64 | 74 | 69 | 67 | 67 | 70 | 65 | 69.09 |
| 1955 | 50 | 43 | 44 | 65 | 48 | 56 | 56 | 48 | 54 | 58 | 53 | 52.27 |
| 1956 | 62 | 64 | 65 | 72 | 60 | 65 | 65 | 63 | 67 | 64 | 63 | 64.55 |
| 1957 | 60 | 61 | 58 | 71 | 56 | 62 | 69 | 62 | 66 | 63 | 67 | 63.18 |
| 1958 | 69 | 68 | 72 | 80 | 64 | 74 | 68 | 71 | 65 | 69 | 67 | 69.73 |
| 1959 | 57 | 52 | 52 | 72 | 53 | 62 | 60 | 56 | 54 | 59 | 60 | 57.91 |
| 1960 | 64 | 58 | 59 | 73 | 60 | 63 | 66 | 60 | 60 | 63 | 65 | 62.82 |
| 1961 | 68 | 62 | 66 | 80 | 63 | 72 | 68 | 65 | 66 | 69 | 75 | 68.55 |
| 1962 | 61 | 61 | 65 | 71 | 60 | 70 | 61 | 62 | 62 | 66 | 64 | 63.91 |
| 1963 | 74 | 77 | 73 | 83 | 72 | 79 | 74 | 75 | 74 | 76 | 78 | 75.91 |
| 1964 | 74 | 72 | 70 | 77 | 63 | 72 | 67 | 70 | 70 | 73 | 70 | 70.73 |
| 1965 | 60 | 62 | 62 | 65 | 61 | 65 | 55 | 59 | 58 | 60 | 61 | 60.73 |
| 1966 | 59 | 57 | 64 | 64 | 56 | 68 | 57 | 65 | 62 | 57 | 59 | 60.73 |
| 1967 | 66 | 66 | 64 | 73 | 62 | 69 | 67 | 67 | 66 | 74 | 70 | 67.64 |
| 1968 | 59 | 53 | 57 | 66 | 56 | 65 | 60 | 56 | 64 | 57 | 55 | 58.91 |
| 1969 | 52 | 53 | 54 | 59 | 51 | 62 | 53 | 51 | 53 | 55 | 53 | 54.18 |
| 1970 | 61 | 56 | 60 | 69 | 61 | 68 | 61 | 59 | 61 | 58 | 59 | 61.18 |
| 1971 | 68 | 62 | 68 | 76 | 67 | 73 | 70 | 65 | 74 | 66 | 65 | 68.55 |
| 1972 | 57 | 59 | 68 | 74 | 61 | 71 | 62 | 65 | 67 | 64 | 60 | 64.36 |

|            |       |       |       |       |       |       |       |       |       |       |       |       |
|------------|-------|-------|-------|-------|-------|-------|-------|-------|-------|-------|-------|-------|
| 1973       | 69    | 64    | 66    | 68    | 63    | 67    | 62    | 63    | 62    | 66    | 63    | 64.82 |
| 1974       | 56    | 55    | 55    | 64    | 57    | 61    | 54    | 53    | 58    | 56    | 52    | 56.45 |
| 1975       | 55    | 54    | 50    | 66    | 63    | 59    | 61    | 55    | 61    | 59    | 60    | 58.45 |
| 1976       | 47    | 44    | 48    | 50    | 54    | 47    | 46    | 44    | 54    | 41    | 47    | 47.45 |
| 1977       | 66    | 68    | 64    | 69    | 65    | 66    | 65    | 67    | 63    | 63    | 66    | 65.64 |
| 1978       | 54    | 56    | 58    | 65    | 60    | 59    | 55    | 57    | 56    | 58    | 51    | 57.18 |
| 1979       | 51    | 50    | 51    | 55    | 60    | 57    | 52    | 48    | 52    | 50    | 52    | 52.55 |
| 1980       | 53    | 51    | 58    | 59    | 55    | 60    | 48    | 51    | 50    | 57    | 50    | 53.82 |
| 1981       | 56    | 53    | 54    | 65    | 59    | 61    | 54    | 57    | 55    | 58    | 56    | 57.09 |
| 1982       | 61    | 64    | 70    | 70    | 72    | 74    | 64    | 63    | 62    | 64    | 60    | 65.82 |
| 1983       | 67    | 65    | 65    | 75    | 66    | 66    | 65    | 69    | 64    | 70    | 67    | 67.18 |
| 1984       | 45    | 47    | 49    | 62    | 51    | 59    | 46    | 46    | 46    | 55    | 53    | 50.82 |
| 1985       | 55    | 54    | 59    | 64    | 55    | 62    | 55    | 56    | 53    | 57    | 55    | 56.82 |
| 1986       | 57    | 53    | 49    | 61    | 58    | 55    | 57    | 55    | 54    | 58    | 58    | 55.91 |
| 1987       | 69    | 64    | 68    | 77    | 70    | 70    | 63    | 66    | 67    | 66    | 61    | 67.36 |
| 1988       | 71    | 69    | 73    | 82    | 70    | 75    | 69    | 73    | 70    | 73    | 72    | 72.45 |
| 1989       | 54    | 50    | 52    | 60    | 53    | 59    | 51    | 53    | 50    | 53    | 54    | 53.55 |
| 1990       | 70    | 66    | 71    | 76    | 64    | 75    | 69    | 70    | 67    | 70    | 68    | 69.64 |
| 1991       | 63    | 57    | 55    | 74    | 61    | 61    | 60    | 60    | 60    | 63    | 63    | 61.55 |
| 1992       | 78    | 69    | 68    | 76    | 75    | 78    | 76    | 72    | 77    | 73    | 76    | 74.36 |
| 1993       | 69    | 71    | 73    | 78    | 66    | 76    | 68    | 68    | 67    | 71    | 68    | 70.45 |
| 1994       | 75    | 72    | 73    | 79    | 73    | 73    | 71    | 71    | 75    | 71    | 74    | 73.36 |
| 1995       | 74    | 73    | 69    | 80    | 64    | 79    | 71    | 71    | 72    | 76    | 70    | 72.64 |
| 1996       | 65    | 72    | 73    | 81    | 61    | 80    | 57    | 73    | 60    | 73    | 58    | 68.45 |
| 1997       | 65    | 70    | 64    | 72    | 64    | 72    | 63    | 66    | 68    | 69    | 62    | 66.82 |
| 1998       | 71    | 69    | 74    | 77    | 72    | 81    | 63    | 71    | 68    | 71    | 66    | 71.18 |
| 1999       | 65    | 64    | 64    | 81    | 64    | 76    | 64    | 65    | 71    | 76    | 60    | 68.18 |
| 2000       | 74    | 76    | 75    | 83    | 75    | 76    | 75    | 77    | 78    | 79    | 75    | 76.64 |
| 2001       | 64    | 66    | 66    | 73    | 64    | 74    | 64    | 66    | 63    | 69    | 64    | 66.64 |
| 2002       | 76    | 72    | 69    | 76    | 71    | 73    | 76    | 73    | 77    | 77    | 79    | 74.45 |
| 2003       | 84    | 83    | 84    | 88    | 86    | 87    | 87    | 83    | 85    | 86    | 88    | 85.55 |
| 2004       | 59    | 63    | 59    | 73    | 63    | 68    | 65    | 63    | 67    | 71    | 66    | 65.18 |
| 2005       | 65    | 63    | 58    | 65    | 58    | 69    | 55    | 60    | 62    | 62    | 60    | 61.55 |
| 2006       | 65    | 65    | 64    | 69    | 62    | 71    | 58    | 66    | 61    | 64    | 63    | 64.36 |
| 2007       | 79    | 80    | 82    | 86    | 78    | 87    | 80    | 82    | 80    | 83    | 82    | 81.73 |
| 2008       | 75    | 74    | 71    | 80    | 67    | 83    | 76    | 81    | 73    | 80    | 76    | 76.00 |
| 2009       | 73    | 72    | 72    | 79    | 73    | 79    | 73    | 74    | 75    | 77    | 76    | 74.82 |
| 2010       | 71    | 71    | 70    | 77    | 68    | 73    | 70    | 73    | 71    | 71    | 73    | 71.64 |
| 2011       | 72    | 73    | 73    | 84    | 75    | 78    | 36    | 76    | 75    | 79    | 69    | 71.82 |
| 2012       | 88    | 86    | 87    | 90    | 84    | 91    | 61    | 88    | 85    | 88    | 83    | 84.64 |
| 2013       | 72    | 69    | 70    | 80    | 69    | 73    | 34    | 71    | 73    | 74    | 73    | 68.91 |
| 2014       | 67    | 68    | 64    | 77    | 63    | 73    | 16    | 71    | 65    | 76    | 67    | 64.27 |
| 2015       | 79    | 75    | 77    | 83    | 77    | 78    | 77    | 81    | 77    | 81    | 76    | 78.27 |
| 2016       | 76    | 71    | 72    | 80    | 73    | 75    | 74    | 75    | 73    | 72    | 76    | 74.27 |
| 2017       | 85    | 79    | 79    | 87    | 81    | 81    | 85    | 85    | 82    | 86    | 86    | 83.27 |
| 2018       | 76    | 70    | 71    | 86    | 73    | 78    | 73    | 75    | 74    | 76    | 79    | 75.55 |
| <b>avg</b> | 65.79 | 64.51 | 65.34 | 73.53 | 64.51 | 70.64 | 63.10 | 65.99 | 66.07 | 67.76 | 65.94 |       |

**Table S3. 3.** Absolute and average number (avg) of SU (days) for 11 stations in autumn in Serbia from 1949 to 2018.

|      | BG | KG | KV | NE | LO | NI | NS | SP | SM | VG | ZR | avg   |
|------|----|----|----|----|----|----|----|----|----|----|----|-------|
| 1949 | 10 | 13 | 10 | 8  | 11 | 18 | 16 | 12 | 16 | 14 | 9  | 12.45 |
| 1950 | 17 | 18 | 17 | 22 | 21 | 25 | 13 | 17 | 17 | 20 | 15 | 18.36 |
| 1951 | 19 | 18 | 18 | 15 | 19 | 25 | 18 | 21 | 18 | 18 | 20 | 19.00 |
| 1952 | 13 | 17 | 17 | 18 | 15 | 23 | 10 | 16 | 16 | 18 | 12 | 15.91 |
| 1953 | 23 | 25 | 23 | 23 | 23 | 24 | 26 | 23 | 25 | 21 | 25 | 23.73 |
| 1954 | 21 | 20 | 20 | 23 | 22 | 22 | 22 | 21 | 22 | 20 | 21 | 21.27 |
| 1955 | 13 | 13 | 12 | 13 | 11 | 14 | 13 | 13 | 12 | 11 | 12 | 12.45 |
| 1956 | 19 | 19 | 21 | 22 | 19 | 22 | 21 | 20 | 23 | 19 | 20 | 20.45 |
| 1957 | 13 | 12 | 9  | 16 | 12 | 15 | 12 | 13 | 12 | 13 | 14 | 12.82 |
| 1958 | 17 | 19 | 13 | 14 | 20 | 20 | 16 | 16 | 19 | 14 | 20 | 17.09 |
| 1959 | 7  | 7  | 7  | 8  | 7  | 7  | 6  | 8  | 6  | 5  | 7  | 6.82  |
| 1960 | 14 | 12 | 16 | 7  | 16 | 19 | 14 | 10 | 10 | 5  | 11 | 12.18 |
| 1961 | 21 | 21 | 22 | 20 | 20 | 25 | 23 | 22 | 21 | 22 | 9  | 20.55 |
| 1962 | 12 | 14 | 13 | 16 | 14 | 19 | 13 | 11 | 12 | 13 | 18 | 14.09 |
| 1963 | 22 | 20 | 21 | 17 | 25 | 22 | 23 | 20 | 22 | 18 | 26 | 21.45 |
| 1964 | 8  | 11 | 12 | 7  | 11 | 14 | 9  | 9  | 9  | 8  | 11 | 9.91  |
| 1965 | 22 | 25 | 27 | 24 | 16 | 28 | 21 | 25 | 19 | 25 | 25 | 23.36 |
| 1966 | 26 | 22 | 25 | 18 | 27 | 29 | 23 | 21 | 27 | 22 | 27 | 24.27 |
| 1967 | 22 | 26 | 28 | 25 | 23 | 34 | 25 | 25 | 27 | 23 | 21 | 25.36 |
| 1968 | 8  | 7  | 8  | 11 | 12 | 16 | 6  | 7  | 6  | 11 | 6  | 8.91  |
| 1969 | 11 | 8  | 8  | 10 | 11 | 17 | 10 | 10 | 10 | 9  | 9  | 10.27 |
| 1970 | 12 | 11 | 13 | 16 | 16 | 14 | 13 | 10 | 14 | 8  | 9  | 12.36 |
| 1971 | 1  | 1  | 3  | 8  | 4  | 10 | 3  | 1  | 3  | 3  | 4  | 3.73  |
| 1972 | 5  | 4  | 2  | 7  | 5  | 6  | 3  | 6  | 6  | 3  | 4  | 4.64  |
| 1973 | 15 | 19 | 16 | 18 | 17 | 19 | 14 | 17 | 13 | 19 | 16 | 16.64 |
| 1974 | 16 | 16 | 15 | 18 | 16 | 20 | 14 | 16 | 14 | 15 | 14 | 15.82 |
| 1975 | 20 | 20 | 20 | 25 | 23 | 25 | 22 | 21 | 23 | 20 | 20 | 21.73 |
| 1976 | 18 | 17 | 11 | 9  | 18 | 19 | 15 | 10 | 16 | 9  | 10 | 13.82 |
| 1977 | 13 | 14 | 11 | 12 | 16 | 13 | 13 | 12 | 13 | 10 | 11 | 12.55 |
| 1978 | 8  | 10 | 9  | 9  | 7  | 11 | 8  | 7  | 6  | 7  | 8  | 8.18  |
| 1979 | 19 | 20 | 20 | 18 | 23 | 20 | 20 | 21 | 18 | 18 | 21 | 19.82 |
| 1980 | 9  | 11 | 16 | 9  | 14 | 17 | 8  | 8  | 8  | 4  | 8  | 10.18 |
| 1981 | 17 | 19 | 19 | 13 | 20 | 21 | 13 | 16 | 14 | 13 | 12 | 16.09 |
| 1982 | 25 | 28 | 30 | 27 | 27 | 29 | 28 | 28 | 29 | 26 | 27 | 27.64 |
| 1983 | 13 | 16 | 15 | 18 | 19 | 16 | 14 | 13 | 15 | 13 | 13 | 15.00 |
| 1984 | 20 | 23 | 19 | 26 | 21 | 27 | 18 | 19 | 19 | 23 | 19 | 21.27 |
| 1985 | 17 | 18 | 18 | 18 | 19 | 21 | 19 | 18 | 19 | 15 | 20 | 18.36 |
| 1986 | 15 | 15 | 19 | 21 | 18 | 20 | 14 | 15 | 14 | 19 | 15 | 16.82 |
| 1987 | 25 | 25 | 26 | 27 | 29 | 30 | 25 | 24 | 26 | 24 | 25 | 26.00 |
| 1988 | 14 | 14 | 14 | 13 | 16 | 18 | 15 | 14 | 17 | 13 | 14 | 14.73 |
| 1989 | 7  | 5  | 6  | 10 | 7  | 8  | 9  | 6  | 9  | 5  | 5  | 7.00  |
| 1990 | 13 | 15 | 13 | 13 | 14 | 23 | 10 | 14 | 9  | 9  | 9  | 12.91 |
| 1991 | 20 | 20 | 14 | 19 | 23 | 26 | 16 | 22 | 16 | 15 | 15 | 18.73 |
| 1992 | 17 | 18 | 19 | 19 | 22 | 24 | 16 | 17 | 16 | 13 | 16 | 17.91 |
| 1993 | 21 | 23 | 22 | 19 | 20 | 24 | 16 | 21 | 17 | 19 | 17 | 19.91 |
| 1994 | 27 | 27 | 28 | 29 | 27 | 32 | 27 | 28 | 27 | 28 | 26 | 27.82 |
| 1995 | 12 | 11 | 9  | 11 | 11 | 14 | 7  | 10 | 8  | 7  | 6  | 9.64  |
| 1996 | 1  | 2  | 1  | 2  | 3  | 3  | 0  | 1  | 1  | 0  | 0  | 1.27  |

---

|            |       |       |       |       |       |       |       |       |       |       |       |       |
|------------|-------|-------|-------|-------|-------|-------|-------|-------|-------|-------|-------|-------|
| 1997       | 14    | 14    | 14    | 14    | 16    | 15    | 14    | 16    | 15    | 10    | 15    | 14.27 |
| 1998       | 9     | 8     | 7     | 3     | 14    | 11    | 5     | 8     | 7     | 4     | 4     | 7.27  |
| 1999       | 25    | 20    | 21    | 23    | 24    | 27    | 25    | 21    | 27    | 22    | 23    | 23.45 |
| 2000       | 14    | 11    | 12    | 12    | 20    | 19    | 18    | 14    | 15    | 12    | 13    | 14.55 |
| 2001       | 12    | 14    | 10    | 16    | 17    | 22    | 11    | 15    | 12    | 9     | 12    | 13.64 |
| 2002       | 14    | 19    | 13    | 15    | 19    | 18    | 15    | 15    | 15    | 13    | 14    | 15.45 |
| 2003       | 15    | 13    | 15    | 12    | 17    | 19    | 12    | 15    | 15    | 14    | 12    | 14.45 |
| 2004       | 14    | 20    | 10    | 15    | 13    | 23    | 12    | 15    | 13    | 15    | 13    | 14.82 |
| 2005       | 15    | 11    | 9     | 11    | 12    | 18    | 14    | 13    | 16    | 11    | 15    | 13.18 |
| 2006       | 20    | 20    | 16    | 19    | 19    | 28    | 22    | 20    | 21    | 16    | 22    | 20.27 |
| 2007       | 6     | 14    | 10    | 10    | 7     | 14    | 6     | 14    | 6     | 13    | 7     | 9.73  |
| 2008       | 15    | 15    | 13    | 14    | 19    | 23    | 12    | 16    | 14    | 14    | 13    | 15.27 |
| 2009       | 29    | 27    | 27    | 24    | 28    | 29    | 29    | 29    | 28    | 24    | 30    | 27.64 |
| 2010       | 9     | 14    | 13    | 18    | 7     | 19    | 4     | 10    | 6     | 7     | 7     | 10.36 |
| 2011       | 32    | 29    | 30    | 34    | 32    | 33    | 12    | 31    | 32    | 35    | 33    | 30.27 |
| 2012       | 28    | 31    | 32    | 31    | 31    | 37    | 15    | 31    | 29    | 28    | 25    | 28.91 |
| 2013       | 16    | 22    | 16    | 18    | 25    | 23    | 1     | 23    | 18    | 14    | 11    | 17.00 |
| 2014       | 16    | 11    | 10    | 11    | 13    | 18    | 0     | 15    | 13    | 12    | 12    | 11.91 |
| 2015       | 15    | 16    | 16    | 14    | 14    | 16    | 15    | 15    | 14    | 16    | 14    | 15.00 |
| 2016       | 19    | 17    | 18    | 23    | 20    | 20    | 20    | 21    | 19    | 20    | 19    | 19.64 |
| 2017       | 18    | 19    | 17    | 21    | 17    | 21    | 13    | 21    | 13    | 16    | 13    | 17.18 |
| 2018       | 30    | 28    | 21    | 23    | 26    | 33    | 27    | 26    | 28    | 26    | 28    | 26.91 |
| <b>avg</b> | 16.04 | 16.60 | 15.79 | 16.46 | 17.43 | 20.49 | 14.60 | 16.27 | 15.93 | 14.83 | 15.10 |       |

---

**Table S4. 1.** Absolute and average number (avg) of Tx90 (days) for 11 stations in spring in Serbia from 1949 to 2018.

|      | BG | KG | KV | NE | LO | NI | NS | SP | SM | VG | ZR | avg   |
|------|----|----|----|----|----|----|----|----|----|----|----|-------|
| 1949 | 6  | 5  | 5  | 2  | 7  | 13 | 11 | 8  | 9  | 5  | 10 | 7.36  |
| 1950 | 11 | 16 | 14 | 15 | 13 | 17 | 12 | 14 | 13 | 16 | 12 | 13.91 |
| 1951 | 8  | 9  | 8  | 7  | 8  | 12 | 7  | 8  | 7  | 8  | 7  | 8.09  |
| 1952 | 18 | 22 | 19 | 17 | 20 | 21 | 23 | 23 | 22 | 23 | 19 | 20.64 |
| 1953 | 6  | 4  | 3  | 4  | 4  | 1  | 9  | 5  | 7  | 9  | 7  | 5.36  |
| 1954 | 0  | 1  | 0  | 0  | 0  | 0  | 0  | 0  | 0  | 0  | 0  | 0.09  |
| 1955 | 4  | 5  | 6  | 8  | 6  | 4  | 7  | 4  | 3  | 6  | 5  | 5.27  |
| 1956 | 4  | 3  | 3  | 3  | 4  | 3  | 5  | 3  | 3  | 4  | 3  | 3.45  |
| 1957 | 11 | 11 | 9  | 8  | 8  | 9  | 13 | 10 | 14 | 10 | 13 | 10.55 |
| 1958 | 11 | 11 | 11 | 16 | 10 | 9  | 14 | 10 | 9  | 12 | 12 | 11.36 |
| 1959 | 4  | 4  | 6  | 7  | 7  | 4  | 5  | 3  | 4  | 5  | 9  | 5.27  |
| 1960 | 3  | 3  | 3  | 6  | 5  | 2  | 7  | 3  | 5  | 2  | 11 | 4.55  |
| 1961 | 12 | 13 | 18 | 24 | 12 | 11 | 14 | 13 | 12 | 14 | 24 | 15.18 |
| 1962 | 6  | 6  | 7  | 7  | 7  | 9  | 12 | 5  | 7  | 4  | 14 | 7.64  |
| 1963 | 2  | 1  | 1  | 0  | 2  | 1  | 3  | 2  | 3  | 0  | 4  | 1.73  |
| 1964 | 2  | 5  | 4  | 2  | 2  | 1  | 2  | 6  | 4  | 2  | 5  | 3.18  |
| 1965 | 3  | 1  | 2  | 2  | 1  | 3  | 2  | 2  | 2  | 3  | 3  | 2.18  |
| 1966 | 6  | 5  | 6  | 9  | 5  | 4  | 3  | 5  | 2  | 6  | 8  | 5.36  |
| 1967 | 9  | 5  | 6  | 4  | 6  | 6  | 8  | 9  | 6  | 5  | 6  | 6.36  |
| 1968 | 17 | 18 | 19 | 20 | 17 | 21 | 17 | 18 | 13 | 18 | 14 | 17.45 |
| 1969 | 11 | 6  | 14 | 9  | 13 | 8  | 13 | 10 | 11 | 10 | 8  | 10.27 |
| 1970 | 4  | 6  | 10 | 10 | 6  | 7  | 4  | 5  | 4  | 6  | 1  | 5.73  |
| 1971 | 7  | 2  | 6  | 3  | 8  | 4  | 9  | 5  | 12 | 7  | 5  | 6.18  |
| 1972 | 11 | 12 | 15 | 13 | 11 | 15 | 15 | 12 | 13 | 12 | 14 | 13.00 |
| 1973 | 8  | 10 | 10 | 9  | 10 | 8  | 10 | 8  | 10 | 9  | 4  | 8.73  |
| 1974 | 8  | 7  | 7  | 5  | 7  | 7  | 9  | 7  | 9  | 7  | 6  | 7.18  |
| 1975 | 14 | 15 | 15 | 16 | 13 | 15 | 16 | 14 | 15 | 16 | 13 | 14.73 |
| 1976 | 3  | 2  | 2  | 2  | 6  | 2  | 6  | 1  | 6  | 1  | 4  | 3.18  |
| 1977 | 8  | 9  | 13 | 7  | 15 | 9  | 13 | 8  | 8  | 9  | 8  | 9.73  |
| 1978 | 7  | 6  | 6  | 0  | 6  | 6  | 5  | 7  | 4  | 1  | 6  | 4.91  |
| 1979 | 7  | 8  | 11 | 4  | 12 | 4  | 11 | 5  | 8  | 6  | 6  | 7.45  |
| 1980 | 1  | 2  | 2  | 1  | 1  | 1  | 1  | 1  | 1  | 1  | 1  | 1.18  |
| 1981 | 6  | 6  | 5  | 5  | 7  | 4  | 5  | 5  | 7  | 6  | 6  | 5.64  |
| 1982 | 3  | 5  | 6  | 4  | 2  | 4  | 1  | 4  | 1  | 3  | 2  | 3.18  |
| 1983 | 21 | 25 | 28 | 20 | 21 | 28 | 18 | 22 | 19 | 18 | 21 | 21.91 |
| 1984 | 2  | 2  | 3  | 1  | 1  | 1  | 0  | 1  | 0  | 0  | 2  | 1.18  |
| 1985 | 4  | 5  | 4  | 7  | 6  | 4  | 6  | 5  | 6  | 3  | 5  | 5.00  |
| 1986 | 13 | 12 | 10 | 6  | 12 | 15 | 14 | 12 | 12 | 14 | 15 | 12.27 |
| 1987 | 3  | 2  | 2  | 1  | 3  | 1  | 1  | 3  | 1  | 3  | 1  | 1.91  |
| 1988 | 1  | 1  | 1  | 1  | 0  | 1  | 1  | 2  | 1  | 1  | 0  | 0.91  |
| 1989 | 12 | 10 | 10 | 10 | 13 | 15 | 11 | 13 | 11 | 6  | 12 | 11.18 |
| 1990 | 16 | 15 | 13 | 15 | 13 | 14 | 16 | 16 | 13 | 17 | 15 | 14.82 |
| 1991 | 5  | 5  | 5  | 0  | 7  | 4  | 5  | 6  | 6  | 3  | 4  | 4.55  |
| 1992 | 8  | 7  | 6  | 12 | 9  | 6  | 10 | 7  | 6  | 9  | 9  | 8.09  |
| 1993 | 6  | 5  | 7  | 8  | 9  | 5  | 8  | 7  | 4  | 7  | 5  | 6.45  |
| 1994 | 17 | 15 | 11 | 11 | 14 | 17 | 10 | 15 | 14 | 12 | 8  | 13.09 |
| 1995 | 15 | 12 | 7  | 11 | 9  | 9  | 8  | 10 | 11 | 11 | 8  | 10.09 |
| 1996 | 7  | 7  | 6  | 6  | 6  | 6  | 6  | 6  | 6  | 4  | 4  | 5.82  |

|            |      |      |      |      |      |      |      |      |      |      |      |       |
|------------|------|------|------|------|------|------|------|------|------|------|------|-------|
| 1997       | 7    | 13   | 9    | 12   | 11   | 7    | 7    | 9    | 10   | 5    | 5    | 8.64  |
| 1998       | 7    | 8    | 7    | 14   | 9    | 9    | 8    | 7    | 9    | 11   | 7    | 8.73  |
| 1999       | 4    | 6    | 3    | 8    | 10   | 7    | 7    | 5    | 7    | 6    | 6    | 6.27  |
| 2000       | 21   | 25   | 23   | 22   | 22   | 24   | 24   | 23   | 22   | 20   | 22   | 22.55 |
| 2001       | 12   | 14   | 15   | 9    | 18   | 16   | 12   | 16   | 12   | 13   | 11   | 13.45 |
| 2002       | 13   | 11   | 9    | 18   | 10   | 14   | 13   | 12   | 12   | 14   | 15   | 12.82 |
| 2003       | 15   | 17   | 15   | 13   | 19   | 16   | 18   | 17   | 19   | 16   | 18   | 16.64 |
| 2004       | 7    | 3    | 6    | 9    | 6    | 4    | 5    | 5    | 6    | 5    | 5    | 5.55  |
| 2005       | 4    | 8    | 4    | 7    | 4    | 7    | 6    | 4    | 6    | 6    | 6    | 5.64  |
| 2006       | 9    | 10   | 8    | 7    | 9    | 8    | 6    | 8    | 8    | 11   | 4    | 8.00  |
| 2007       | 14   | 13   | 13   | 14   | 14   | 13   | 16   | 12   | 13   | 18   | 13   | 13.91 |
| 2008       | 10   | 11   | 10   | 14   | 11   | 15   | 12   | 14   | 11   | 12   | 10   | 11.82 |
| 2009       | 19   | 15   | 15   | 12   | 20   | 12   | 16   | 16   | 16   | 19   | 18   | 16.18 |
| 2010       | 5    | 6    | 8    | 4    | 5    | 5    | 3    | 8    | 4    | 3    | 1    | 4.73  |
| 2011       | 6    | 5    | 5    | 4    | 6    | 5    | 0    | 8    | 6    | 10   | 5    | 5.45  |
| 2012       | 17   | 14   | 11   | 23   | 16   | 12   | 0    | 16   | 17   | 18   | 16   | 14.55 |
| 2013       | 14   | 14   | 12   | 16   | 13   | 13   | 0    | 16   | 14   | 18   | 13   | 13.00 |
| 2014       | 9    | 7    | 6    | 8    | 10   | 7    | 1    | 6    | 4    | 6    | 7    | 6.45  |
| 2015       | 8    | 9    | 5    | 9    | 9    | 6    | 12   | 10   | 10   | 10   | 11   | 9.00  |
| 2016       | 15   | 14   | 15   | 14   | 16   | 16   | 15   | 18   | 15   | 14   | 13   | 15.00 |
| 2017       | 12   | 12   | 14   | 15   | 13   | 14   | 12   | 12   | 12   | 16   | 11   | 13.00 |
| 2018       | 29   | 25   | 24   | 24   | 28   | 28   | 35   | 25   | 29   | 26   | 29   | 27.45 |
| <b>avg</b> | 8.97 | 8.96 | 8.89 | 9.06 | 9.47 | 8.99 | 9.06 | 9.07 | 8.94 | 9.01 | 8.93 |       |

**Table S4. 2.** Absolute and average number (avg) of Tx90 (days) for 11 stations in summer in Serbia from 1949 to 2018.

|      | BG | KG | KV | NE | LO | NI | NS | SP | SM | VG | ZR | avg   |
|------|----|----|----|----|----|----|----|----|----|----|----|-------|
| 1949 | 1  | 4  | 2  | 3  | 3  | 5  | 8  | 2  | 4  | 3  | 2  | 3.36  |
| 1950 | 19 | 26 | 26 | 18 | 22 | 26 | 23 | 23 | 25 | 23 | 21 | 22.91 |
| 1951 | 7  | 6  | 8  | 9  | 8  | 15 | 13 | 9  | 12 | 5  | 8  | 9.09  |
| 1952 | 20 | 29 | 29 | 27 | 23 | 34 | 29 | 24 | 34 | 28 | 25 | 27.45 |
| 1953 | 2  | 2  | 2  | 2  | 2  | 4  | 4  | 7  | 0  | 6  | 6  | 3.36  |
| 1954 | 5  | 7  | 7  | 3  | 7  | 5  | 8  | 6  | 2  | 1  | 3  | 4.91  |
| 1955 | 2  | 2  | 3  | 2  | 2  | 3  | 4  | 1  | 2  | 1  | 1  | 2.09  |
| 1956 | 7  | 6  | 6  | 9  | 6  | 5  | 8  | 5  | 6  | 8  | 6  | 6.55  |
| 1957 | 16 | 11 | 9  | 6  | 21 | 8  | 20 | 11 | 17 | 9  | 15 | 13.00 |
| 1958 | 7  | 7  | 10 | 17 | 13 | 7  | 10 | 7  | 7  | 9  | 9  | 9.36  |
| 1959 | 2  | 0  | 0  | 2  | 2  | 0  | 5  | 0  | 1  | 1  | 3  | 1.45  |
| 1960 | 2  | 2  | 4  | 4  | 1  | 1  | 4  | 0  | 1  | 2  | 1  | 2.00  |
| 1961 | 8  | 6  | 6  | 6  | 9  | 4  | 12 | 4  | 9  | 3  | 14 | 7.36  |
| 1962 | 8  | 7  | 4  | 11 | 9  | 7  | 9  | 7  | 6  | 10 | 11 | 8.09  |
| 1963 | 13 | 7  | 4  | 9  | 15 | 9  | 13 | 9  | 9  | 12 | 13 | 10.27 |
| 1964 | 4  | 3  | 3  | 3  | 1  | 2  | 6  | 4  | 5  | 5  | 6  | 3.82  |
| 1965 | 3  | 2  | 10 | 8  | 5  | 6  | 5  | 4  | 5  | 6  | 4  | 5.27  |
| 1966 | 0  | 0  | 0  | 0  | 1  | 1  | 0  | 0  | 0  | 1  | 0  | 0.27  |
| 1967 | 3  | 3  | 1  | 4  | 2  | 3  | 2  | 5  | 1  | 5  | 4  | 3.00  |
| 1968 | 6  | 5  | 6  | 9  | 5  | 4  | 11 | 7  | 8  | 10 | 10 | 7.36  |
| 1969 | 0  | 0  | 0  | 0  | 0  | 0  | 0  | 0  | 0  | 0  | 0  | 0.00  |
| 1970 | 0  | 0  | 1  | 0  | 2  | 0  | 1  | 0  | 0  | 0  | 0  | 0.36  |
| 1971 | 2  | 2  | 3  | 4  | 6  | 4  | 5  | 1  | 7  | 3  | 3  | 3.64  |
| 1972 | 2  | 4  | 5  | 6  | 2  | 8  | 5  | 5  | 6  | 4  | 3  | 4.55  |



|            |      |      |      |      |      |      |      |      |      |      |      |       |
|------------|------|------|------|------|------|------|------|------|------|------|------|-------|
| 1973       | 4    | 2    | 2    | 2    | 4    | 5    | 3    | 2    | 4    | 2    | 2    | 2.91  |
| 1974       | 4    | 1    | 2    | 2    | 7    | 2    | 4    | 1    | 5    | 1    | 3    | 2.91  |
| 1975       | 0    | 0    | 1    | 0    | 0    | 1    | 0    | 0    | 0    | 0    | 0    | 0.18  |
| 1976       | 0    | 0    | 0    | 0    | 1    | 0    | 0    | 0    | 0    | 0    | 0    | 0.09  |
| 1977       | 2    | 4    | 4    | 1    | 5    | 2    | 7    | 2    | 3    | 2    | 3    | 3.18  |
| 1978       | 0    | 2    | 2    | 0    | 1    | 1    | 1    | 2    | 0    | 0    | 0    | 0.82  |
| 1979       | 5    | 5    | 4    | 2    | 9    | 5    | 6    | 1    | 5    | 5    | 6    | 4.82  |
| 1980       | 1    | 0    | 3    | 1    | 2    | 1    | 2    | 0    | 1    | 0    | 1    | 1.09  |
| 1981       | 7    | 8    | 7    | 2    | 12   | 5    | 7    | 7    | 7    | 4    | 4    | 6.36  |
| 1982       | 4    | 4    | 3    | 2    | 4    | 2    | 1    | 3    | 4    | 2    | 2    | 2.82  |
| 1983       | 2    | 1    | 5    | 5    | 8    | 1    | 6    | 4    | 4    | 4    | 4    | 4.00  |
| 1984       | 2    | 2    | 2    | 4    | 2    | 6    | 2    | 2    | 2    | 3    | 2    | 2.64  |
| 1985       | 9    | 12   | 15   | 7    | 14   | 10   | 10   | 12   | 12   | 7    | 8    | 10.55 |
| 1986       | 3    | 0    | 0    | 0    | 2    | 0    | 4    | 2    | 1    | 1    | 2    | 1.36  |
| 1987       | 11   | 14   | 12   | 14   | 10   | 14   | 11   | 11   | 10   | 13   | 8    | 11.64 |
| 1988       | 14   | 13   | 14   | 15   | 22   | 9    | 17   | 15   | 16   | 10   | 15   | 14.55 |
| 1989       | 1    | 1    | 0    | 0    | 3    | 0    | 6    | 1    | 3    | 0    | 2    | 1.55  |
| 1990       | 6    | 8    | 10   | 11   | 8    | 10   | 9    | 10   | 6    | 7    | 5    | 8.18  |
| 1991       | 8    | 4    | 3    | 1    | 7    | 4    | 5    | 5    | 4    | 3    | 3    | 4.27  |
| 1992       | 14   | 10   | 8    | 22   | 17   | 9    | 17   | 16   | 10   | 16   | 17   | 14.18 |
| 1993       | 18   | 22   | 26   | 25   | 18   | 21   | 14   | 18   | 14   | 18   | 12   | 18.73 |
| 1994       | 12   | 11   | 9    | 10   | 10   | 12   | 15   | 10   | 10   | 12   | 15   | 11.45 |
| 1995       | 4    | 3    | 1    | 1    | 1    | 1    | 1    | 6    | 1    | 2    | 3    | 2.18  |
| 1996       | 12   | 10   | 8    | 9    | 6    | 12   | 6    | 14   | 7    | 9    | 6    | 9.00  |
| 1997       | 6    | 6    | 8    | 1    | 4    | 8    | 5    | 7    | 6    | 2    | 2    | 5.00  |
| 1998       | 20   | 18   | 23   | 12   | 19   | 19   | 15   | 18   | 20   | 13   | 16   | 17.55 |
| 1999       | 5    | 8    | 4    | 5    | 5    | 9    | 5    | 5    | 9    | 4    | 2    | 5.55  |
| 2000       | 33   | 32   | 31   | 29   | 26   | 30   | 34   | 34   | 29   | 31   | 29   | 30.73 |
| 2001       | 8    | 10   | 10   | 11   | 7    | 10   | 1    | 9    | 5    | 6    | 6    | 7.55  |
| 2002       | 14   | 14   | 10   | 14   | 11   | 13   | 17   | 11   | 11   | 13   | 17   | 13.18 |
| 2003       | 22   | 29   | 28   | 23   | 29   | 27   | 26   | 25   | 23   | 32   | 24   | 26.18 |
| 2004       | 5    | 5    | 2    | 8    | 5    | 8    | 10   | 3    | 5    | 8    | 7    | 6.00  |
| 2005       | 6    | 5    | 1    | 6    | 2    | 6    | 1    | 4    | 7    | 2    | 5    | 4.09  |
| 2006       | 11   | 11   | 9    | 9    | 11   | 7    | 13   | 12   | 11   | 12   | 10   | 10.55 |
| 2007       | 23   | 30   | 32   | 31   | 25   | 32   | 23   | 27   | 21   | 27   | 23   | 26.73 |
| 2008       | 16   | 18   | 11   | 9    | 10   | 16   | 13   | 17   | 12   | 17   | 17   | 14.18 |
| 2009       | 12   | 10   | 8    | 8    | 11   | 7    | 13   | 12   | 15   | 16   | 14   | 11.45 |
| 2010       | 14   | 13   | 11   | 16   | 13   | 13   | 8    | 12   | 13   | 13   | 9    | 12.27 |
| 2011       | 21   | 16   | 17   | 14   | 19   | 11   | 0    | 17   | 15   | 19   | 14   | 14.82 |
| 2012       | 37   | 38   | 43   | 38   | 36   | 37   | 5    | 33   | 36   | 36   | 36   | 34.09 |
| 2013       | 15   | 15   | 18   | 16   | 18   | 17   | 1    | 18   | 17   | 21   | 18   | 15.82 |
| 2014       | 4    | 0    | 2    | 4    | 3    | 0    | 0    | 4    | 4    | 6    | 4    | 2.82  |
| 2015       | 32   | 25   | 26   | 31   | 28   | 21   | 33   | 27   | 28   | 33   | 35   | 29.00 |
| 2016       | 4    | 6    | 7    | 6    | 6    | 8    | 4    | 5    | 6    | 3    | 3    | 5.27  |
| 2017       | 37   | 30   | 30   | 27   | 33   | 28   | 38   | 40   | 34   | 34   | 39   | 33.64 |
| 2018       | 9    | 9    | 8    | 8    | 7    | 8    | 11   | 8    | 6    | 6    | 6    | 7.82  |
| <b>avg</b> | 9.09 | 8.94 | 8.99 | 8.91 | 9.54 | 8.99 | 9.07 | 9.04 | 8.99 | 9.00 | 8.96 |       |

**Table S4. 3.** Absolute and average number (avg) of Tx90 (days) for 11 stations in autumn in Serbia from 1949 to 2018.

|      | BG | KG | KV | NE | LO | NI | NS | SP | SM | VG | ZR | avg   |
|------|----|----|----|----|----|----|----|----|----|----|----|-------|
| 1949 | 11 | 9  | 8  | 1  | 10 | 9  | 11 | 10 | 12 | 10 | 10 | 9.18  |
| 1950 | 6  | 9  | 10 | 5  | 8  | 11 | 6  | 9  | 10 | 13 | 8  | 8.64  |
| 1951 | 5  | 7  | 5  | 6  | 6  | 9  | 12 | 5  | 12 | 6  | 9  | 7.45  |
| 1952 | 8  | 11 | 13 | 13 | 8  | 18 | 7  | 8  | 8  | 12 | 7  | 10.27 |
| 1953 | 9  | 9  | 7  | 10 | 10 | 5  | 18 | 10 | 11 | 7  | 14 | 10.00 |
| 1954 | 10 | 5  | 10 | 17 | 9  | 7  | 12 | 8  | 10 | 11 | 9  | 9.82  |
| 1955 | 1  | 1  | 1  | 0  | 1  | 0  | 2  | 1  | 1  | 1  | 1  | 0.91  |
| 1956 | 7  | 8  | 10 | 12 | 8  | 5  | 11 | 8  | 10 | 8  | 10 | 8.82  |
| 1957 | 2  | 3  | 2  | 1  | 1  | 0  | 5  | 1  | 4  | 5  | 8  | 2.91  |
| 1958 | 4  | 3  | 4  | 5  | 4  | 2  | 5  | 3  | 4  | 3  | 11 | 4.36  |
| 1959 | 1  | 1  | 1  | 3  | 1  | 0  | 3  | 2  | 2  | 2  | 4  | 1.82  |
| 1960 | 13 | 14 | 14 | 14 | 8  | 14 | 10 | 12 | 8  | 10 | 9  | 11.45 |
| 1961 | 15 | 17 | 17 | 19 | 13 | 15 | 17 | 16 | 13 | 18 | 1  | 14.64 |
| 1962 | 7  | 6  | 9  | 4  | 5  | 9  | 7  | 6  | 7  | 4  | 9  | 6.64  |
| 1963 | 17 | 13 | 12 | 17 | 15 | 11 | 20 | 14 | 17 | 15 | 19 | 15.45 |
| 1964 | 2  | 6  | 5  | 4  | 3  | 5  | 2  | 7  | 2  | 3  | 3  | 3.82  |
| 1965 | 9  | 11 | 12 | 11 | 7  | 11 | 7  | 13 | 5  | 12 | 14 | 10.18 |
| 1966 | 16 | 7  | 8  | 8  | 11 | 13 | 15 | 12 | 15 | 13 | 20 | 12.55 |
| 1967 | 10 | 13 | 19 | 14 | 14 | 21 | 15 | 10 | 12 | 17 | 11 | 14.18 |
| 1968 | 6  | 5  | 6  | 4  | 6  | 7  | 6  | 5  | 4  | 6  | 5  | 5.45  |
| 1969 | 10 | 11 | 10 | 9  | 10 | 8  | 10 | 10 | 8  | 10 | 10 | 9.64  |
| 1970 | 10 | 9  | 12 | 17 | 13 | 10 | 12 | 7  | 14 | 11 | 9  | 11.27 |
| 1971 | 6  | 3  | 8  | 10 | 5  | 6  | 5  | 3  | 5  | 6  | 4  | 5.55  |
| 1972 | 1  | 3  | 4  | 7  | 1  | 1  | 1  | 1  | 2  | 0  | 0  | 1.91  |
| 1973 | 7  | 9  | 8  | 10 | 6  | 6  | 8  | 9  | 6  | 9  | 8  | 7.82  |
| 1974 | 0  | 0  | 1  | 2  | 5  | 2  | 2  | 0  | 0  | 1  | 1  | 1.27  |
| 1975 | 4  | 3  | 3  | 6  | 8  | 4  | 5  | 2  | 5  | 3  | 2  | 4.09  |
| 1976 | 8  | 7  | 5  | 5  | 11 | 5  | 12 | 6  | 13 | 6  | 10 | 8.00  |
| 1977 | 4  | 9  | 6  | 13 | 7  | 7  | 3  | 5  | 3  | 8  | 2  | 6.09  |
| 1978 | 0  | 0  | 1  | 0  | 2  | 0  | 2  | 0  | 1  | 0  | 1  | 0.64  |
| 1979 | 7  | 7  | 7  | 5  | 7  | 5  | 6  | 6  | 6  | 6  | 6  | 6.18  |
| 1980 | 4  | 6  | 7  | 9  | 6  | 6  | 4  | 7  | 5  | 7  | 6  | 6.09  |
| 1981 | 11 | 11 | 9  | 11 | 12 | 8  | 10 | 11 | 11 | 8  | 7  | 9.91  |
| 1982 | 5  | 9  | 10 | 1  | 6  | 5  | 8  | 5  | 5  | 2  | 7  | 5.73  |
| 1983 | 7  | 6  | 4  | 6  | 12 | 3  | 7  | 4  | 5  | 5  | 4  | 5.73  |
| 1984 | 5  | 6  | 6  | 16 | 12 | 8  | 10 | 3  | 6  | 6  | 6  | 7.64  |
| 1985 | 7  | 7  | 8  | 6  | 10 | 9  | 11 | 6  | 10 | 9  | 11 | 8.55  |
| 1986 | 6  | 5  | 6  | 5  | 9  | 8  | 5  | 6  | 5  | 10 | 7  | 6.55  |
| 1987 | 15 | 15 | 19 | 15 | 16 | 18 | 12 | 13 | 11 | 16 | 14 | 14.91 |
| 1988 | 1  | 1  | 3  | 1  | 2  | 1  | 2  | 0  | 3  | 0  | 0  | 1.27  |
| 1989 | 8  | 8  | 8  | 5  | 8  | 5  | 14 | 7  | 12 | 6  | 8  | 8.09  |
| 1990 | 15 | 14 | 15 | 11 | 17 | 17 | 12 | 17 | 13 | 15 | 12 | 14.36 |
| 1991 | 10 | 7  | 7  | 8  | 8  | 5  | 6  | 8  | 6  | 6  | 6  | 7.00  |
| 1992 | 9  | 6  | 5  | 8  | 5  | 5  | 4  | 5  | 3  | 3  | 4  | 5.18  |
| 1993 | 17 | 18 | 19 | 10 | 11 | 18 | 15 | 18 | 12 | 13 | 14 | 15.00 |
| 1994 | 19 | 19 | 20 | 19 | 17 | 21 | 15 | 18 | 14 | 14 | 14 | 17.27 |
| 1995 | 7  | 4  | 2  | 5  | 2  | 2  | 2  | 3  | 2  | 4  | 3  | 3.27  |
| 1996 | 7  | 7  | 5  | 7  | 9  | 2  | 7  | 6  | 11 | 6  | 8  | 6.82  |

|            |      |      |      |      |      |      |      |      |      |      |      |       |
|------------|------|------|------|------|------|------|------|------|------|------|------|-------|
| 1997       | 8    | 10   | 9    | 4    | 11   | 8    | 8    | 10   | 8    | 7    | 7    | 8.18  |
| 1998       | 3    | 3    | 2    | 2    | 5    | 3    | 4    | 3    | 4    | 3    | 3    | 3.18  |
| 1999       | 7    | 9    | 9    | 10   | 12   | 13   | 9    | 9    | 10   | 11   | 4    | 9.36  |
| 2000       | 17   | 12   | 10   | 5    | 17   | 17   | 24   | 15   | 21   | 16   | 17   | 15.55 |
| 2001       | 8    | 7    | 6    | 7    | 10   | 9    | 6    | 9    | 9    | 5    | 6    | 7.45  |
| 2002       | 12   | 13   | 10   | 5    | 14   | 13   | 15   | 13   | 12   | 14   | 16   | 12.45 |
| 2003       | 11   | 12   | 11   | 5    | 19   | 13   | 12   | 8    | 11   | 10   | 8    | 10.91 |
| 2004       | 10   | 15   | 11   | 10   | 6    | 16   | 7    | 14   | 8    | 10   | 8    | 10.45 |
| 2005       | 4    | 0    | 3    | 4    | 2    | 4    | 5    | 2    | 5    | 1    | 3    | 3.00  |
| 2006       | 15   | 14   | 10   | 18   | 14   | 12   | 16   | 16   | 14   | 16   | 17   | 14.73 |
| 2007       | 2    | 3    | 3    | 5    | 2    | 4    | 1    | 4    | 1    | 2    | 2    | 2.64  |
| 2008       | 17   | 12   | 11   | 11   | 18   | 16   | 15   | 17   | 16   | 12   | 18   | 14.82 |
| 2009       | 17   | 15   | 13   | 17   | 16   | 11   | 18   | 21   | 18   | 17   | 18   | 16.45 |
| 2010       | 10   | 13   | 13   | 16   | 9    | 15   | 7    | 16   | 8    | 14   | 7    | 11.64 |
| 2011       | 13   | 12   | 15   | 24   | 13   | 9    | 0    | 14   | 13   | 15   | 13   | 12.82 |
| 2012       | 23   | 23   | 25   | 16   | 23   | 25   | 5    | 27   | 25   | 18   | 25   | 21.36 |
| 2013       | 16   | 19   | 18   | 8    | 16   | 16   | 4    | 17   | 16   | 15   | 18   | 14.82 |
| 2014       | 10   | 10   | 9    | 4    | 10   | 2    | 1    | 10   | 10   | 8    | 8    | 7.45  |
| 2015       | 17   | 19   | 17   | 23   | 16   | 17   | 19   | 19   | 15   | 18   | 19   | 18.09 |
| 2016       | 5    | 2    | 4    | 7    | 6    | 3    | 11   | 5    | 6    | 8    | 8    | 5.91  |
| 2017       | 14   | 11   | 16   | 18   | 9    | 12   | 10   | 12   | 10   | 13   | 13   | 12.55 |
| 2018       | 21   | 13   | 8    | 12   | 13   | 13   | 24   | 16   | 17   | 19   | 24   | 16.36 |
| <b>avg</b> | 8.99 | 8.79 | 8.91 | 8.94 | 9.23 | 8.83 | 8.89 | 8.90 | 8.87 | 8.83 | 8.97 |       |

**Table S4. 4.** Absolute and average number (avg) of Tx90 (days) for 11 stations in winter in Serbia from 1949 to 2017.

|      | BG | KG | KV | NE | LO | NI | NS | SP | SM | VG | ZR | avg   |
|------|----|----|----|----|----|----|----|----|----|----|----|-------|
| 1949 | 6  | 4  | 5  | 10 | 7  | 6  | 6  | 7  | 8  | 10 | 5  | 6.73  |
| 1950 | 8  | 11 | 10 | 4  | 12 | 19 | 16 | 13 | 14 | 18 | 13 | 12.55 |
| 1951 | 3  | 3  | 4  | 5  | 5  | 9  | 4  | 3  | 3  | 10 | 2  | 4.64  |
| 1952 | 4  | 8  | 9  | 3  | 7  | 8  | 4  | 8  | 6  | 7  | 4  | 6.18  |
| 1953 | 3  | 4  | 3  | 3  | 2  | 0  | 5  | 4  | 5  | 5  | 5  | 3.55  |
| 1954 | 12 | 17 | 15 | 2  | 14 | 18 | 11 | 15 | 11 | 13 | 13 | 12.82 |
| 1955 | 10 | 8  | 12 | 12 | 17 | 7  | 14 | 7  | 11 | 10 | 11 | 10.82 |
| 1956 | 7  | 5  | 5  | 9  | 7  | 4  | 8  | 4  | 5  | 8  | 9  | 6.45  |
| 1957 | 19 | 20 | 21 | 16 | 16 | 20 | 17 | 19 | 17 | 18 | 15 | 18.00 |
| 1958 | 15 | 12 | 11 | 9  | 14 | 13 | 13 | 11 | 13 | 16 | 13 | 12.73 |
| 1959 | 8  | 9  | 12 | 3  | 8  | 7  | 7  | 7  | 6  | 6  | 3  | 6.91  |
| 1960 | 8  | 12 | 12 | 12 | 11 | 13 | 10 | 10 | 12 | 13 | 24 | 12.45 |
| 1961 | 10 | 7  | 6  | 8  | 6  | 8  | 9  | 10 | 6  | 12 | 4  | 7.82  |
| 1962 | 4  | 2  | 4  | 0  | 2  | 4  | 2  | 2  | 1  | 0  | 1  | 2.00  |
| 1963 | 0  | 0  | 0  | 0  | 0  | 2  | 0  | 0  | 0  | 0  | 0  | 0.18  |
| 1964 | 4  | 4  | 6  | 2  | 2  | 4  | 2  | 4  | 3  | 3  | 3  | 3.36  |
| 1965 | 19 | 14 | 11 | 7  | 18 | 12 | 18 | 12 | 18 | 8  | 15 | 13.82 |
| 1966 | 4  | 4  | 4  | 4  | 7  | 4  | 3  | 4  | 4  | 2  | 3  | 3.91  |
| 1967 | 4  | 3  | 4  | 5  | 5  | 6  | 5  | 6  | 4  | 4  | 4  | 4.55  |
| 1968 | 3  | 2  | 2  | 1  | 4  | 5  | 4  | 2  | 6  | 1  | 3  | 3.00  |
| 1969 | 5  | 6  | 10 | 1  | 3  | 7  | 3  | 6  | 1  | 6  | 3  | 4.64  |
| 1970 | 11 | 8  | 11 | 6  | 8  | 11 | 8  | 10 | 12 | 14 | 10 | 9.91  |
| 1971 | 0  | 0  | 2  | 5  | 1  | 1  | 1  | 0  | 3  | 1  | 2  | 1.45  |
| 1972 | 4  | 1  | 1  | 2  | 3  | 2  | 4  | 2  | 4  | 4  | 5  | 2.91  |

|            |      |      |      |      |      |      |      |      |      |      |      |       |
|------------|------|------|------|------|------|------|------|------|------|------|------|-------|
| 1973       | 12   | 9    | 6    | 4    | 7    | 10   | 17   | 9    | 16   | 13   | 16   | 10.82 |
| 1974       | 7    | 3    | 2    | 18   | 4    | 1    | 8    | 5    | 10   | 8    | 10   | 6.91  |
| 1975       | 3    | 2    | 3    | 13   | 4    | 1    | 5    | 3    | 5    | 2    | 2    | 3.91  |
| 1976       | 15   | 12   | 18   | 8    | 17   | 11   | 15   | 14   | 13   | 11   | 12   | 13.27 |
| 1977       | 3    | 2    | 3    | 2    | 1    | 5    | 4    | 3    | 4    | 2    | 3    | 2.91  |
| 1978       | 10   | 11   | 8    | 7    | 15   | 13   | 10   | 11   | 8    | 8    | 8    | 9.91  |
| 1979       | 6    | 7    | 7    | 11   | 11   | 5    | 7    | 5    | 9    | 6    | 5    | 7.18  |
| 1980       | 2    | 1    | 0    | 6    | 0    | 1    | 0    | 1    | 0    | 1    | 1    | 1.18  |
| 1981       | 6    | 6    | 6    | 7    | 7    | 7    | 8    | 6    | 8    | 3    | 6    | 6.36  |
| 1982       | 12   | 15   | 17   | 13   | 12   | 13   | 13   | 11   | 15   | 11   | 12   | 13.09 |
| 1983       | 6    | 5    | 4    | 12   | 7    | 7    | 10   | 7    | 9    | 8    | 7    | 7.45  |
| 1984       | 3    | 2    | 2    | 0    | 4    | 3    | 5    | 2    | 2    | 0    | 3    | 2.36  |
| 1985       | 11   | 9    | 11   | 12   | 13   | 8    | 15   | 10   | 12   | 11   | 12   | 11.27 |
| 1986       | 1    | 1    | 3    | 6    | 1    | 1    | 1    | 1    | 2    | 0    | 2    | 1.73  |
| 1987       | 11   | 14   | 13   | 15   | 11   | 16   | 12   | 14   | 10   | 11   | 12   | 12.64 |
| 1988       | 6    | 7    | 8    | 14   | 6    | 5    | 7    | 5    | 7    | 5    | 8    | 7.09  |
| 1989       | 26   | 22   | 20   | 16   | 31   | 17   | 29   | 23   | 29   | 21   | 30   | 24.00 |
| 1990       | 5    | 5    | 4    | 6    | 4    | 6    | 6    | 5    | 4    | 7    | 6    | 5.27  |
| 1991       | 4    | 1    | 1    | 15   | 2    | 3    | 5    | 2    | 2    | 2    | 2    | 3.55  |
| 1992       | 11   | 10   | 11   | 15   | 14   | 6    | 12   | 10   | 12   | 10   | 12   | 11.18 |
| 1993       | 16   | 17   | 21   | 9    | 18   | 20   | 13   | 16   | 9    | 17   | 11   | 15.18 |
| 1994       | 19   | 16   | 12   | 14   | 17   | 13   | 15   | 16   | 12   | 16   | 10   | 14.55 |
| 1995       | 4    | 5    | 5    | 0    | 5    | 5    | 4    | 5    | 5    | 3    | 4    | 4.09  |
| 1996       | 6    | 10   | 6    | 10   | 6    | 10   | 6    | 9    | 4    | 6    | 4    | 7.00  |
| 1997       | 22   | 22   | 19   | 26   | 20   | 16   | 20   | 25   | 22   | 24   | 21   | 21.55 |
| 1998       | 4    | 3    | 1    | 5    | 4    | 3    | 3    | 1    | 3    | 4    | 4    | 3.18  |
| 1999       | 6    | 5    | 8    | 11   | 8    | 7    | 5    | 6    | 4    | 4    | 5    | 6.27  |
| 2000       | 18   | 22   | 24   | 14   | 16   | 26   | 20   | 22   | 16   | 21   | 20   | 19.91 |
| 2001       | 17   | 14   | 14   | 26   | 17   | 16   | 16   | 17   | 13   | 14   | 17   | 16.45 |
| 2002       | 3    | 3    | 1    | 3    | 2    | 1    | 3    | 1    | 3    | 1    | 1    | 2.00  |
| 2003       | 3    | 5    | 4    | 9    | 5    | 6    | 4    | 5    | 6    | 4    | 7    | 5.27  |
| 2004       | 7    | 7    | 9    | 8    | 9    | 9    | 6    | 6    | 10   | 5    | 8    | 7.64  |
| 2005       | 5    | 6    | 10   | 3    | 4    | 10   | 5    | 5    | 4    | 6    | 4    | 5.64  |
| 2006       | 26   | 30   | 22   | 33   | 23   | 22   | 26   | 29   | 26   | 26   | 28   | 26.45 |
| 2007       | 10   | 10   | 10   | 14   | 13   | 13   | 13   | 10   | 14   | 11   | 15   | 12.09 |
| 2008       | 9    | 10   | 14   | 7    | 9    | 13   | 9    | 10   | 10   | 19   | 13   | 11.18 |
| 2009       | 11   | 12   | 14   | 2    | 11   | 14   | 9    | 11   | 8    | 9    | 10   | 10.09 |
| 2010       | 12   | 17   | 15   | 8    | 11   | 12   | 8    | 15   | 11   | 8    | 12   | 11.73 |
| 2011       | 13   | 6    | 6    | 11   | 11   | 6    | 1    | 9    | 11   | 8    | 10   | 8.36  |
| 2012       | 7    | 6    | 7    | 2    | 5    | 7    | 3    | 5    | 9    | 6    | 5    | 5.64  |
| 2013       | 19   | 23   | 19   | 10   | 16   | 19   | 12   | 27   | 18   | 18   | 23   | 18.55 |
| 2014       | 13   | 11   | 4    | 11   | 12   | 8    | 8    | 12   | 9    | 13   | 10   | 10.09 |
| 2015       | 18   | 20   | 14   | 33   | 20   | 16   | 12   | 19   | 18   | 20   | 15   | 18.64 |
| 2016       | 7    | 9    | 9    | 11   | 9    | 8    | 8    | 8    | 7    | 6    | 8    | 8.18  |
| 2017       | 18   | 16   | 18   | 11   | 22   | 13   | 20   | 18   | 18   | 18   | 17   | 17.18 |
| <b>avg</b> | 9.04 | 8.88 | 8.88 | 8.99 | 9.32 | 9.01 | 8.87 | 8.99 | 8.99 | 8.93 | 9.00 |       |

**Table S5. 1.** Absolute and average number (avg) of FD (days) for 11 stations in spring in Serbia from 1949 to 2018.

|      | BG | KG | KV | NE | LO | NI | NS | SP | SM | VG | ZR | avg   |
|------|----|----|----|----|----|----|----|----|----|----|----|-------|
| 1949 | 18 | 27 | 27 | 21 | 24 | 28 | 24 | 27 | 22 | 25 | 24 | 24.27 |
| 1950 | 1  | 8  | 6  | 9  | 7  | 8  | 11 | 10 | 6  | 11 | 8  | 7.73  |
| 1951 | 8  | 6  | 6  | 11 | 9  | 7  | 10 | 6  | 4  | 6  | 9  | 7.45  |
| 1952 | 12 | 19 | 19 | 21 | 18 | 18 | 24 | 16 | 21 | 22 | 22 | 19.27 |
| 1953 | 12 | 24 | 20 | 14 | 18 | 22 | 22 | 24 | 17 | 22 | 21 | 19.64 |
| 1954 | 3  | 9  | 7  | 18 | 6  | 8  | 7  | 8  | 10 | 5  | 10 | 8.27  |
| 1955 | 14 | 20 | 18 | 14 | 19 | 16 | 21 | 18 | 17 | 14 | 18 | 17.18 |
| 1956 | 23 | 25 | 27 | 22 | 23 | 20 | 24 | 26 | 25 | 24 | 25 | 24.00 |
| 1957 | 6  | 13 | 14 | 15 | 11 | 10 | 14 | 13 | 11 | 11 | 13 | 11.91 |
| 1958 | 24 | 30 | 27 | 21 | 30 | 24 | 29 | 29 | 26 | 24 | 27 | 26.45 |
| 1959 | 0  | 6  | 5  | 10 | 0  | 7  | 5  | 9  | 2  | 4  | 9  | 5.18  |
| 1960 | 6  | 9  | 9  | 10 | 7  | 7  | 10 | 10 | 8  | 7  | 11 | 8.55  |
| 1961 | 4  | 10 | 9  | 4  | 5  | 7  | 8  | 11 | 9  | 8  | 3  | 7.09  |
| 1962 | 17 | 17 | 18 | 14 | 19 | 13 | 22 | 19 | 20 | 17 | 22 | 18.00 |
| 1963 | 14 | 16 | 18 | 16 | 13 | 15 | 15 | 16 | 16 | 15 | 21 | 15.91 |
| 1964 | 16 | 14 | 15 | 19 | 11 | 12 | 19 | 16 | 16 | 16 | 19 | 15.73 |
| 1965 | 7  | 9  | 10 | 17 | 8  | 11 | 13 | 10 | 11 | 11 | 11 | 10.73 |
| 1966 | 8  | 13 | 14 | 10 | 8  | 10 | 15 | 13 | 11 | 12 | 12 | 11.45 |
| 1967 | 1  | 12 | 15 | 5  | 2  | 10 | 10 | 13 | 6  | 8  | 10 | 8.36  |
| 1968 | 11 | 19 | 14 | 12 | 11 | 12 | 20 | 20 | 13 | 14 | 18 | 14.91 |
| 1969 | 10 | 15 | 16 | 23 | 12 | 12 | 17 | 17 | 13 | 16 | 17 | 15.27 |
| 1970 | 5  | 11 | 9  | 13 | 9  | 13 | 9  | 10 | 8  | 10 | 9  | 9.64  |
| 1971 | 15 | 18 | 17 | 19 | 18 | 17 | 17 | 18 | 17 | 18 | 17 | 17.36 |
| 1972 | 3  | 8  | 11 | 14 | 8  | 11 | 7  | 9  | 9  | 8  | 9  | 8.82  |
| 1973 | 7  | 13 | 18 | 12 | 9  | 13 | 13 | 14 | 11 | 15 | 18 | 13.00 |
| 1974 | 6  | 15 | 12 | 22 | 8  | 11 | 15 | 17 | 13 | 6  | 11 | 12.36 |
| 1975 | 2  | 6  | 7  | 12 | 4  | 8  | 5  | 7  | 8  | 6  | 7  | 6.55  |
| 1976 | 12 | 20 | 18 | 19 | 20 | 16 | 22 | 20 | 22 | 23 | 26 | 19.82 |
| 1977 | 1  | 7  | 10 | 8  | 4  | 9  | 6  | 11 | 7  | 9  | 10 | 7.45  |
| 1978 | 3  | 7  | 7  | 4  | 5  | 4  | 9  | 7  | 5  | 7  | 8  | 6.00  |
| 1979 | 1  | 12 | 10 | 11 | 7  | 9  | 10 | 12 | 9  | 6  | 8  | 8.64  |
| 1980 | 5  | 10 | 8  | 16 | 8  | 9  | 10 | 12 | 10 | 15 | 13 | 10.55 |
| 1981 | 2  | 4  | 10 | 13 | 5  | 8  | 6  | 6  | 5  | 7  | 2  | 6.18  |
| 1982 | 5  | 17 | 15 | 15 | 12 | 13 | 11 | 16 | 14 | 15 | 11 | 13.09 |
| 1983 | 3  | 9  | 10 | 13 | 7  | 9  | 6  | 11 | 6  | 10 | 7  | 8.27  |
| 1984 | 4  | 11 | 12 | 10 | 8  | 10 | 16 | 11 | 9  | 13 | 10 | 10.36 |
| 1985 | 4  | 7  | 10 | 16 | 9  | 6  | 5  | 7  | 7  | 7  | 9  | 7.91  |
| 1986 | 9  | 12 | 13 | 15 | 12 | 7  | 14 | 11 | 16 | 10 | 13 | 12.00 |
| 1987 | 17 | 18 | 20 | 21 | 20 | 19 | 19 | 18 | 20 | 19 | 20 | 19.18 |
| 1988 | 4  | 10 | 13 | 8  | 13 | 14 | 15 | 9  | 21 | 8  | 13 | 11.64 |
| 1989 | 0  | 3  | 3  | 2  | 2  | 2  | 3  | 5  | 5  | 7  | 7  | 3.55  |
| 1990 | 0  | 8  | 8  | 5  | 6  | 6  | 4  | 9  | 8  | 8  | 5  | 6.09  |
| 1991 | 2  | 11 | 7  | 8  | 5  | 6  | 6  | 12 | 7  | 8  | 7  | 7.18  |
| 1992 | 2  | 16 | 16 | 14 | 10 | 16 | 19 | 17 | 19 | 16 | 13 | 14.36 |
| 1993 | 13 | 18 | 18 | 19 | 18 | 18 | 18 | 18 | 21 | 20 | 19 | 18.18 |
| 1994 | 0  | 5  | 7  | 11 | 3  | 4  | 3  | 7  | 6  | 8  | 5  | 5.36  |
| 1995 | 6  | 12 | 11 | 11 | 6  | 12 | 13 | 13 | 14 | 15 | 13 | 11.45 |
| 1996 | 18 | 21 | 20 | 23 | 20 | 19 | 22 | 22 | 23 | 22 | 21 | 21.00 |

|            |      |       |       |       |       |       |       |       |       |       |       |       |
|------------|------|-------|-------|-------|-------|-------|-------|-------|-------|-------|-------|-------|
| 1997       | 11   | 20    | 21    | 17    | 20    | 22    | 27    | 26    | 32    | 25    | 27    | 22.55 |
| 1998       | 14   | 20    | 21    | 16    | 17    | 23    | 20    | 26    | 23    | 25    | 20    | 20.45 |
| 1999       | 1    | 8     | 5     | 8     | 3     | 7     | 8     | 8     | 8     | 11    | 7     | 6.73  |
| 2000       | 5    | 18    | 15    | 11    | 11    | 16    | 16    | 15    | 19    | 17    | 10    | 13.91 |
| 2001       | 1    | 6     | 7     | 7     | 3     | 6     | 3     | 7     | 4     | 7     | 3     | 4.91  |
| 2002       | 4    | 7     | 5     | 7     | 6     | 5     | 10    | 11    | 7     | 11    | 12    | 7.73  |
| 2003       | 11   | 23    | 19    | 22    | 16    | 21    | 24    | 25    | 20    | 22    | 22    | 20.45 |
| 2004       | 6    | 7     | 8     | 5     | 10    | 9     | 10    | 8     | 11    | 8     | 10    | 8.36  |
| 2005       | 15   | 20    | 21    | 20    | 17    | 19    | 19    | 21    | 21    | 25    | 18    | 19.64 |
| 2006       | 12   | 13    | 16    | 11    | 13    | 14    | 14    | 15    | 16    | 15    | 13    | 13.82 |
| 2007       | 0    | 3     | 2     | 6     | 1     | 1     | 1     | 7     | 5     | 8     | 3     | 3.36  |
| 2008       | 0    | 6     | 4     | 3     | 4     | 2     | 5     | 4     | 4     | 7     | 5     | 4.00  |
| 2009       | 1    | 7     | 7     | 5     | 2     | 8     | 8     | 7     | 9     | 9     | 8     | 6.45  |
| 2010       | 7    | 11    | 13    | 10    | 11    | 10    | 11    | 11    | 11    | 12    | 11    | 10.73 |
| 2011       | 10   | 14    | 12    | 15    | 10    | 11    | 21    | 12    | 11    | 16    | 11    | 13.00 |
| 2012       | 4    | 11    | 10    | 11    | 9     | 11    | 19    | 14    | 16    | 17    | 13    | 12.27 |
| 2013       | 10   | 10    | 13    | 13    | 12    | 10    | 22    | 15    | 13    | 13    | 14    | 13.18 |
| 2014       | 0    | 4     | 1     | 0     | 0     | 1     | 16    | 4     | 4     | 8     | 4     | 3.82  |
| 2015       | 0    | 8     | 5     | 5     | 5     | 9     | 8     | 6     | 10    | 10    | 8     | 6.73  |
| 2016       | 0    | 6     | 5     | 4     | 4     | 5     | 5     | 5     | 6     | 10    | 5     | 5.00  |
| 2017       | 0    | 4     | 3     | 1     | 1     | 3     | 3     | 4     | 7     | 13    | 4     | 3.91  |
| 2018       | 11   | 14    | 12    | 14    | 15    | 10    | 14    | 14    | 14    | 13    | 12    | 13.00 |
| <b>Avg</b> | 6.96 | 12.43 | 12.27 | 12.44 | 10.10 | 11.27 | 13.24 | 13.21 | 12.50 | 13.00 | 12.59 |       |

**Table S5. 2.** Absolute and average number (avg) of FD (days) for 11 stations in autumn in Serbia from 1949 to 2018.

|      | BG | KG | KV | NE | LO | NI | NS | SP | SM | VG | ZR | avg   |
|------|----|----|----|----|----|----|----|----|----|----|----|-------|
| 1949 | 0  | 1  | 4  | 10 | 2  | 1  | 1  | 9  | 1  | 1  | 1  | 2.82  |
| 1950 | 4  | 10 | 8  | 20 | 12 | 11 | 11 | 9  | 7  | 15 | 8  | 10.45 |
| 1951 | 2  | 14 | 12 | 12 | 14 | 4  | 15 | 13 | 7  | 13 | 5  | 10.09 |
| 1952 | 5  | 7  | 7  | 13 | 11 | 6  | 12 | 6  | 7  | 8  | 9  | 8.27  |
| 1953 | 13 | 18 | 15 | 14 | 15 | 17 | 17 | 18 | 18 | 18 | 18 | 16.45 |
| 1954 | 7  | 10 | 14 | 7  | 11 | 7  | 9  | 8  | 10 | 3  | 8  | 8.55  |
| 1955 | 4  | 5  | 7  | 3  | 7  | 7  | 9  | 5  | 6  | 6  | 8  | 6.09  |
| 1956 | 11 | 18 | 19 | 19 | 15 | 13 | 17 | 19 | 21 | 15 | 16 | 16.64 |
| 1957 | 2  | 7  | 7  | 6  | 6  | 2  | 6  | 6  | 7  | 2  | 8  | 5.36  |
| 1958 | 3  | 6  | 2  | 8  | 2  | 3  | 2  | 8  | 3  | 3  | 8  | 4.36  |
| 1959 | 4  | 12 | 14 | 22 | 8  | 11 | 13 | 17 | 11 | 11 | 16 | 12.64 |
| 1960 | 0  | 1  | 2  | 0  | 1  | 1  | 0  | 3  | 1  | 0  | 1  | 0.91  |
| 1961 | 4  | 8  | 9  | 7  | 5  | 9  | 7  | 11 | 6  | 5  | 16 | 7.91  |
| 1962 | 4  | 4  | 8  | 7  | 5  | 3  | 8  | 6  | 6  | 4  | 10 | 5.91  |
| 1963 | 1  | 3  | 5  | 6  | 3  | 3  | 2  | 7  | 5  | 4  | 3  | 3.82  |
| 1964 | 1  | 3  | 3  | 2  | 2  | 4  | 4  | 9  | 2  | 5  | 5  | 3.64  |
| 1965 | 11 | 19 | 20 | 22 | 17 | 20 | 22 | 24 | 25 | 25 | 22 | 20.64 |
| 1966 | 6  | 9  | 8  | 5  | 7  | 5  | 7  | 7  | 7  | 7  | 7  | 6.82  |
| 1967 | 8  | 10 | 12 | 12 | 11 | 10 | 14 | 13 | 15 | 11 | 11 | 11.55 |
| 1968 | 4  | 7  | 10 | 12 | 6  | 5  | 10 | 9  | 8  | 6  | 9  | 7.82  |
| 1969 | 2  | 8  | 12 | 17 | 6  | 10 | 4  | 16 | 7  | 5  | 4  | 8.27  |
| 1970 | 1  | 7  | 12 | 14 | 6  | 10 | 8  | 11 | 9  | 9  | 7  | 8.55  |
| 1971 | 9  | 12 | 14 | 12 | 13 | 15 | 13 | 14 | 16 | 12 | 17 | 13.36 |
| 1972 | 4  | 12 | 18 | 12 | 8  | 12 | 8  | 15 | 10 | 13 | 15 | 11.55 |

|            |      |      |       |       |      |      |       |       |       |       |       |       |
|------------|------|------|-------|-------|------|------|-------|-------|-------|-------|-------|-------|
| 1973       | 13   | 22   | 26    | 23    | 19   | 22   | 23    | 24    | 25    | 23    | 27    | 22.45 |
| 1974       | 0    | 9    | 20    | 17    | 7    | 7    | 8     | 12    | 9     | 6     | 9     | 9.45  |
| 1975       | 8    | 10   | 11    | 11    | 7    | 8    | 10    | 12    | 9     | 7     | 7     | 9.09  |
| 1976       | 4    | 8    | 9     | 6     | 10   | 8    | 10    | 8     | 8     | 6     | 11    | 8.00  |
| 1977       | 6    | 11   | 9     | 9     | 9    | 8    | 8     | 12    | 11    | 9     | 10    | 9.27  |
| 1978       | 14   | 19   | 18    | 21    | 10   | 22   | 19    | 20    | 17    | 16    | 21    | 17.91 |
| 1979       | 3    | 6    | 8     | 14    | 9    | 3    | 9     | 8     | 10    | 3     | 10    | 7.55  |
| 1980       | 3    | 5    | 11    | 6     | 7    | 6    | 9     | 10    | 5     | 8     | 10    | 7.27  |
| 1981       | 7    | 11   | 17    | 9     | 12   | 12   | 12    | 16    | 14    | 12    | 13    | 12.27 |
| 1982       | 3    | 10   | 15    | 18    | 10   | 16   | 7     | 10    | 11    | 9     | 6     | 10.45 |
| 1983       | 14   | 18   | 17    | 24    | 17   | 17   | 19    | 18    | 17    | 15    | 20    | 17.82 |
| 1984       | 3    | 10   | 13    | 11    | 7    | 11   | 9     | 14    | 9     | 10    | 9     | 9.64  |
| 1985       | 5    | 9    | 13    | 12    | 9    | 9    | 12    | 8     | 7     | 11    | 12    | 9.73  |
| 1986       | 1    | 13   | 18    | 10    | 5    | 14   | 15    | 17    | 13    | 11    | 16    | 12.09 |
| 1987       | 1    | 8    | 7     | 9     | 6    | 6    | 9     | 9     | 9     | 6     | 8     | 7.09  |
| 1988       | 25   | 29   | 32    | 26    | 29   | 31   | 30    | 28    | 30    | 29    | 32    | 29.18 |
| 1989       | 10   | 13   | 14    | 12    | 12   | 13   | 12    | 13    | 13    | 10    | 12    | 12.18 |
| 1990       | 4    | 10   | 8     | 9     | 8    | 7    | 11    | 9     | 6     | 5     | 13    | 8.18  |
| 1991       | 6    | 11   | 14    | 13    | 13   | 10   | 13    | 12    | 15    | 12    | 12    | 11.91 |
| 1992       | 1    | 5    | 6     | 5     | 5    | 5    | 4     | 6     | 5     | 9     | 5     | 5.09  |
| 1993       | 20   | 25   | 24    | 27    | 16   | 23   | 25    | 24    | 24    | 20    | 25    | 23.00 |
| 1994       | 3    | 9    | 8     | 11    | 5    | 7    | 8     | 10    | 8     | 10    | 11    | 8.18  |
| 1995       | 14   | 19   | 21    | 17    | 17   | 18   | 19    | 21    | 20    | 21    | 19    | 18.73 |
| 1996       | 1    | 4    | 7     | 6     | 5    | 5    | 6     | 6     | 4     | 7     | 4     | 5.00  |
| 1997       | 8    | 14   | 15    | 13    | 14   | 15   | 15    | 19    | 15    | 16    | 14    | 14.36 |
| 1998       | 6    | 10   | 13    | 16    | 10   | 13   | 10    | 10    | 9     | 11    | 10    | 10.73 |
| 1999       | 7    | 10   | 8     | 10    | 10   | 8    | 13    | 11    | 10    | 17    | 15    | 10.82 |
| 2000       | 0    | 7    | 8     | 11    | 2    | 8    | 5     | 9     | 4     | 8     | 5     | 6.09  |
| 2001       | 5    | 10   | 13    | 11    | 9    | 13   | 17    | 15    | 13    | 15    | 16    | 12.45 |
| 2002       | 1    | 3    | 6     | 2     | 1    | 3    | 1     | 3     | 3     | 5     | 2     | 2.73  |
| 2003       | 3    | 8    | 7     | 7     | 7    | 2    | 5     | 11    | 7     | 6     | 7     | 6.36  |
| 2004       | 4    | 5    | 10    | 5     | 6    | 10   | 6     | 7     | 9     | 10    | 8     | 7.27  |
| 2005       | 6    | 12   | 17    | 13    | 7    | 15   | 17    | 14    | 17    | 16    | 14    | 13.45 |
| 2006       | 3    | 9    | 15    | 8     | 5    | 8    | 8     | 12    | 7     | 11    | 8     | 8.55  |
| 2007       | 5    | 8    | 16    | 12    | 11   | 8    | 14    | 10    | 13    | 8     | 8     | 10.27 |
| 2008       | 4    | 11   | 8     | 6     | 6    | 7    | 8     | 11    | 11    | 9     | 8     | 8.09  |
| 2009       | 0    | 4    | 5     | 2     | 3    | 2    | 4     | 7     | 4     | 7     | 3     | 3.73  |
| 2010       | 0    | 4    | 4     | 6     | 2    | 4    | 4     | 6     | 5     | 8     | 5     | 4.36  |
| 2011       | 14   | 25   | 26    | 30    | 20   | 24   | 28    | 27    | 21    | 28    | 24    | 24.27 |
| 2012       | 0    | 3    | 4     | 1     | 1    | 3    | 7     | 4     | 2     | 5     | 1     | 2.82  |
| 2013       | 3    | 10   | 6     | 4     | 6    | 6    | 9     | 7     | 5     | 6     | 7     | 6.27  |
| 2014       | 2    | 7    | 3     | 3     | 4    | 4    | 15    | 7     | 6     | 4     | 2     | 5.18  |
| 2015       | 0    | 8    | 7     | 6     | 5    | 7    | 5     | 7     | 5     | 9     | 4     | 5.73  |
| 2016       | 4    | 8    | 9     | 6     | 3    | 6    | 7     | 12    | 13    | 12    | 9     | 8.09  |
| 2017       | 2    | 3    | 6     | 2     | 3    | 5    | 2     | 6     | 3     | 6     | 4     | 3.82  |
| 2018       | 3    | 9    | 4     | 8     | 2    | 2    | 7     | 8     | 5     | 8     | 6     | 5.64  |
| <b>Avg</b> | 5.13 | 9.90 | 11.40 | 11.00 | 8.30 | 9.29 | 10.47 | 11.61 | 10.01 | 10.01 | 10.49 |       |

**Table S5.3.** Absolute and average number (avg) of FD (days) for 11 stations in winter in Serbia from 1949 to 2017.

|      | BG | KG | KV | NE | LO | NI | NS | SP | SM | VG | ZR | avg   |
|------|----|----|----|----|----|----|----|----|----|----|----|-------|
| 1949 | 49 | 56 | 68 | 64 | 61 | 67 | 60 | 60 | 62 | 65 | 58 | 60.91 |
| 1950 | 32 | 32 | 40 | 51 | 33 | 32 | 43 | 30 | 27 | 33 | 29 | 34.73 |
| 1951 | 52 | 61 | 67 | 65 | 55 | 60 | 71 | 58 | 61 | 63 | 60 | 61.18 |
| 1952 | 54 | 53 | 55 | 51 | 57 | 52 | 61 | 53 | 60 | 52 | 57 | 55.00 |
| 1953 | 74 | 82 | 87 | 80 | 77 | 86 | 81 | 83 | 86 | 83 | 84 | 82.09 |
| 1954 | 40 | 39 | 47 | 56 | 41 | 30 | 52 | 39 | 45 | 40 | 49 | 43.45 |
| 1955 | 48 | 57 | 62 | 63 | 54 | 57 | 51 | 55 | 54 | 60 | 54 | 55.91 |
| 1956 | 54 | 58 | 64 | 56 | 56 | 63 | 60 | 62 | 66 | 64 | 65 | 60.73 |
| 1957 | 52 | 60 | 59 | 56 | 58 | 52 | 60 | 55 | 62 | 59 | 57 | 57.27 |
| 1958 | 48 | 59 | 64 | 64 | 53 | 58 | 59 | 56 | 62 | 61 | 66 | 59.09 |
| 1959 | 39 | 48 | 48 | 52 | 42 | 46 | 45 | 46 | 47 | 51 | 55 | 47.18 |
| 1960 | 29 | 49 | 49 | 40 | 43 | 44 | 47 | 43 | 41 | 42 | 42 | 42.64 |
| 1961 | 57 | 61 | 75 | 70 | 66 | 62 | 67 | 65 | 68 | 60 | 70 | 65.55 |
| 1962 | 72 | 71 | 72 | 79 | 76 | 65 | 78 | 73 | 80 | 75 | 82 | 74.82 |
| 1963 | 78 | 78 | 80 | 81 | 79 | 75 | 85 | 80 | 83 | 83 | 85 | 80.64 |
| 1964 | 61 | 66 | 69 | 74 | 71 | 60 | 72 | 65 | 72 | 63 | 71 | 67.64 |
| 1965 | 34 | 38 | 50 | 49 | 41 | 44 | 45 | 41 | 49 | 52 | 47 | 44.55 |
| 1966 | 50 | 61 | 67 | 67 | 59 | 60 | 64 | 64 | 66 | 58 | 60 | 61.45 |
| 1967 | 51 | 60 | 66 | 56 | 64 | 63 | 65 | 64 | 66 | 64 | 65 | 62.18 |
| 1968 | 56 | 62 | 65 | 78 | 64 | 61 | 70 | 62 | 66 | 67 | 65 | 65.09 |
| 1969 | 61 | 65 | 71 | 70 | 69 | 64 | 78 | 65 | 77 | 65 | 69 | 68.55 |
| 1970 | 45 | 54 | 55 | 59 | 47 | 53 | 55 | 51 | 56 | 53 | 57 | 53.18 |
| 1971 | 37 | 42 | 44 | 44 | 49 | 41 | 41 | 46 | 49 | 43 | 48 | 44.00 |
| 1972 | 46 | 54 | 63 | 60 | 52 | 53 | 55 | 56 | 60 | 58 | 61 | 56.18 |
| 1973 | 35 | 48 | 53 | 73 | 42 | 46 | 43 | 50 | 53 | 47 | 45 | 48.64 |
| 1974 | 42 | 68 | 66 | 62 | 55 | 65 | 62 | 60 | 65 | 62 | 63 | 60.91 |
| 1975 | 54 | 68 | 68 | 67 | 65 | 66 | 65 | 65 | 76 | 69 | 71 | 66.73 |
| 1976 | 29 | 36 | 43 | 62 | 39 | 44 | 38 | 39 | 46 | 35 | 48 | 41.73 |
| 1977 | 56 | 65 | 68 | 76 | 66 | 63 | 63 | 64 | 69 | 68 | 68 | 66.00 |
| 1978 | 51 | 51 | 57 | 69 | 54 | 48 | 55 | 52 | 66 | 53 | 56 | 55.64 |
| 1979 | 49 | 53 | 57 | 63 | 50 | 56 | 54 | 57 | 58 | 61 | 61 | 56.27 |
| 1980 | 58 | 64 | 72 | 60 | 69 | 69 | 69 | 67 | 72 | 69 | 70 | 67.18 |
| 1981 | 63 | 63 | 71 | 74 | 66 | 66 | 65 | 67 | 70 | 64 | 66 | 66.82 |
| 1982 | 26 | 41 | 45 | 45 | 42 | 42 | 42 | 44 | 47 | 45 | 46 | 42.27 |
| 1983 | 50 | 53 | 62 | 62 | 62 | 57 | 60 | 54 | 66 | 53 | 57 | 57.82 |
| 1984 | 69 | 73 | 75 | 79 | 72 | 78 | 75 | 73 | 75 | 76 | 77 | 74.73 |
| 1985 | 44 | 47 | 63 | 55 | 51 | 50 | 53 | 56 | 60 | 54 | 53 | 53.27 |
| 1986 | 61 | 67 | 74 | 71 | 64 | 72 | 68 | 71 | 73 | 69 | 68 | 68.91 |
| 1987 | 20 | 34 | 41 | 44 | 36 | 40 | 44 | 37 | 49 | 37 | 35 | 37.91 |
| 1988 | 48 | 61 | 64 | 50 | 57 | 63 | 63 | 63 | 66 | 65 | 64 | 60.36 |
| 1989 | 39 | 50 | 65 | 56 | 54 | 63 | 55 | 57 | 58 | 54 | 54 | 55.00 |
| 1990 | 50 | 55 | 64 | 64 | 59 | 61 | 64 | 55 | 59 | 56 | 58 | 58.64 |
| 1991 | 57 | 65 | 77 | 65 | 66 | 75 | 64 | 70 | 66 | 75 | 66 | 67.82 |
| 1992 | 60 | 72 | 77 | 68 | 72 | 79 | 70 | 75 | 73 | 76 | 68 | 71.82 |
| 1993 | 30 | 41 | 57 | 59 | 50 | 47 | 47 | 43 | 49 | 44 | 36 | 45.73 |
| 1994 | 43 | 47 | 65 | 61 | 48 | 55 | 52 | 51 | 54 | 56 | 50 | 52.91 |
| 1995 | 65 | 66 | 67 | 75 | 61 | 59 | 71 | 67 | 63 | 66 | 66 | 66.00 |
| 1996 | 41 | 46 | 52 | 60 | 53 | 48 | 62 | 52 | 55 | 57 | 56 | 52.91 |



|            |       |       |       |       |       |       |       |       |       |       |       |       |
|------------|-------|-------|-------|-------|-------|-------|-------|-------|-------|-------|-------|-------|
| 1997       | 26    | 35    | 48    | 47    | 39    | 47    | 38    | 46    | 47    | 54    | 36    | 42.09 |
| 1998       | 56    | 64    | 73    | 65    | 65    | 76    | 73    | 67    | 68    | 75    | 66    | 68.00 |
| 1999       | 51    | 63    | 66    | 58    | 56    | 62    | 63    | 62    | 65    | 68    | 60    | 61.27 |
| 2000       | 33    | 42    | 49    | 49    | 37    | 46    | 49    | 51    | 46    | 46    | 50    | 45.27 |
| 2001       | 46    | 58    | 66    | 66    | 54    | 62    | 58    | 65    | 66    | 65    | 57    | 60.27 |
| 2002       | 69    | 63    | 72    | 70    | 68    | 67    | 72    | 69    | 71    | 72    | 72    | 69.55 |
| 2003       | 50    | 56    | 59    | 58    | 55    | 58    | 55    | 60    | 56    | 60    | 57    | 56.73 |
| 2004       | 49    | 57    | 64    | 52    | 59    | 62    | 68    | 63    | 71    | 58    | 68    | 61.00 |
| 2005       | 54    | 54    | 58    | 62    | 54    | 56    | 55    | 58    | 57    | 65    | 57    | 57.27 |
| 2006       | 15    | 29    | 41    | 30    | 21    | 37    | 34    | 38    | 38    | 40    | 26    | 31.73 |
| 2007       | 41    | 50    | 58    | 59    | 48    | 54    | 54    | 56    | 58    | 59    | 56    | 53.91 |
| 2008       | 39    | 51    | 45    | 43    | 41    | 42    | 47    | 50    | 45    | 46    | 47    | 45.09 |
| 2009       | 42    | 47    | 50    | 56    | 43    | 45    | 52    | 52    | 49    | 45    | 51    | 48.36 |
| 2010       | 53    | 60    | 65    | 66    | 54    | 63    | 66    | 67    | 58    | 60    | 58    | 60.91 |
| 2011       | 41    | 60    | 64    | 61    | 52    | 65    | 79    | 63    | 56    | 67    | 58    | 60.55 |
| 2012       | 33    | 44    | 48    | 50    | 39    | 43    | 71    | 51    | 48    | 50    | 47    | 47.64 |
| 2013       | 27    | 44    | 49    | 53    | 37    | 46    | 52    | 47    | 44    | 45    | 36    | 43.64 |
| 2014       | 26    | 41    | 48    | 41    | 34    | 45    | 50    | 44    | 39    | 49    | 33    | 40.91 |
| 2015       | 26    | 41    | 47    | 37    | 30    | 35    | 38    | 38    | 46    | 44    | 39    | 38.27 |
| 2016       | 67    | 72    | 69    | 70    | 66    | 69    | 72    | 72    | 76    | 75    | 71    | 70.82 |
| 2017       | 25    | 43    | 45    | 46    | 37    | 39    | 41    | 40    | 48    | 48    | 34    | 40.55 |
| <b>avg</b> | 46.78 | 54.70 | 60.49 | 60.06 | 53.75 | 56.22 | 58.78 | 56.81 | 59.49 | 58.20 | 57.06 |       |

**Table S6. 1.** Absolute and average number (avg) of Tn10 (days) for 11 stations in spring in Serbia from 1949 to 2018.

|      | BG | KG | KV | NE | LO | NI | NS | SP | SM | VG | ZR | avg   |
|------|----|----|----|----|----|----|----|----|----|----|----|-------|
| 1949 | 20 | 19 | 20 | 17 | 18 | 21 | 11 | 18 | 16 | 14 | 17 | 17.36 |
| 1950 | 4  | 5  | 4  | 11 | 6  | 6  | 5  | 10 | 3  | 4  | 3  | 5.55  |
| 1951 | 9  | 3  | 4  | 2  | 3  | 3  | 2  | 3  | 3  | 4  | 2  | 3.45  |
| 1952 | 22 | 22 | 21 | 28 | 16 | 25 | 21 | 19 | 19 | 19 | 23 | 21.36 |
| 1953 | 13 | 16 | 16 | 12 | 18 | 15 | 17 | 17 | 16 | 13 | 16 | 15.36 |
| 1954 | 14 | 12 | 7  | 11 | 13 | 7  | 13 | 8  | 9  | 8  | 8  | 10.00 |
| 1955 | 24 | 21 | 21 | 16 | 22 | 17 | 20 | 20 | 17 | 18 | 18 | 19.45 |
| 1956 | 20 | 10 | 14 | 13 | 16 | 14 | 13 | 10 | 12 | 10 | 9  | 12.82 |
| 1957 | 12 | 10 | 10 | 10 | 11 | 8  | 8  | 8  | 8  | 4  | 8  | 8.82  |
| 1958 | 21 | 16 | 14 | 8  | 20 | 17 | 22 | 10 | 16 | 13 | 21 | 16.18 |
| 1959 | 5  | 7  | 6  | 8  | 8  | 9  | 6  | 7  | 7  | 7  | 6  | 6.91  |
| 1960 | 10 | 6  | 5  | 6  | 9  | 5  | 6  | 8  | 6  | 5  | 4  | 6.36  |
| 1961 | 6  | 6  | 6  | 3  | 3  | 6  | 5  | 6  | 5  | 5  | 0  | 4.64  |
| 1962 | 19 | 15 | 15 | 12 | 19 | 15 | 18 | 14 | 15 | 12 | 17 | 15.55 |
| 1963 | 12 | 12 | 13 | 8  | 8  | 11 | 10 | 9  | 8  | 9  | 12 | 10.18 |
| 1964 | 9  | 9  | 7  | 14 | 10 | 11 | 12 | 12 | 9  | 5  | 9  | 9.73  |
| 1965 | 6  | 5  | 6  | 5  | 5  | 8  | 9  | 6  | 3  | 7  | 9  | 6.27  |
| 1966 | 6  | 7  | 11 | 6  | 6  | 7  | 6  | 13 | 5  | 6  | 7  | 7.27  |
| 1967 | 9  | 7  | 9  | 6  | 8  | 8  | 12 | 6  | 8  | 7  | 9  | 8.09  |
| 1968 | 8  | 8  | 5  | 8  | 6  | 7  | 8  | 10 | 7  | 5  | 6  | 7.09  |
| 1969 | 11 | 11 | 9  | 10 | 14 | 5  | 9  | 9  | 9  | 7  | 6  | 9.09  |
| 1970 | 13 | 7  | 11 | 13 | 12 | 9  | 9  | 9  | 9  | 7  | 8  | 9.73  |
| 1971 | 13 | 17 | 13 | 13 | 16 | 12 | 10 | 16 | 12 | 13 | 15 | 13.64 |
| 1972 | 10 | 8  | 12 | 10 | 9  | 8  | 5  | 8  | 11 | 6  | 12 | 9.00  |
| 1973 | 6  | 7  | 10 | 5  | 10 | 9  | 1  | 7  | 7  | 5  | 13 | 7.27  |

|            |      |      |      |      |      |      |      |      |      |      |      |       |
|------------|------|------|------|------|------|------|------|------|------|------|------|-------|
| 1974       | 3    | 9    | 9    | 22   | 10   | 11   | 4    | 10   | 9    | 4    | 10   | 9.18  |
| 1975       | 2    | 6    | 4    | 3    | 2    | 7    | 3    | 2    | 3    | 2    | 6    | 3.64  |
| 1976       | 14   | 18   | 16   | 16   | 19   | 12   | 17   | 19   | 18   | 15   | 21   | 16.82 |
| 1977       | 11   | 11   | 10   | 8    | 12   | 12   | 5    | 10   | 9    | 10   | 15   | 10.27 |
| 1978       | 7    | 5    | 5    | 3    | 6    | 5    | 5    | 7    | 7    | 8    | 9    | 6.09  |
| 1979       | 6    | 8    | 4    | 11   | 10   | 7    | 9    | 7    | 7    | 6    | 9    | 7.64  |
| 1980       | 13   | 10   | 9    | 12   | 17   | 10   | 5    | 10   | 7    | 13   | 11   | 10.64 |
| 1981       | 4    | 7    | 9    | 17   | 7    | 13   | 3    | 5    | 5    | 8    | 3    | 7.36  |
| 1982       | 11   | 10   | 11   | 16   | 12   | 10   | 11   | 12   | 8    | 11   | 13   | 11.36 |
| 1983       | 3    | 6    | 7    | 9    | 6    | 10   | 3    | 5    | 3    | 6    | 5    | 5.73  |
| 1984       | 8    | 6    | 9    | 6    | 8    | 10   | 7    | 9    | 4    | 10   | 9    | 7.82  |
| 1985       | 5    | 4    | 6    | 4    | 8    | 7    | 5    | 5    | 6    | 5    | 5    | 5.45  |
| 1986       | 4    | 3    | 4    | 7    | 6    | 3    | 2    | 5    | 5    | 3    | 3    | 4.09  |
| 1987       | 22   | 22   | 25   | 23   | 26   | 22   | 22   | 22   | 27   | 24   | 22   | 23.36 |
| 1988       | 8    | 7    | 7    | 8    | 7    | 6    | 7    | 6    | 11   | 7    | 8    | 7.45  |
| 1989       | 4    | 4    | 6    | 8    | 5    | 5    | 2    | 4    | 5    | 5    | 1    | 4.45  |
| 1990       | 5    | 6    | 6    | 9    | 8    | 5    | 6    | 6    | 9    | 6    | 9    | 6.82  |
| 1991       | 13   | 10   | 12   | 7    | 12   | 15   | 12   | 13   | 14   | 11   | 12   | 11.91 |
| 1992       | 7    | 14   | 13   | 17   | 12   | 15   | 12   | 11   | 16   | 10   | 11   | 12.55 |
| 1993       | 11   | 10   | 9    | 11   | 8    | 11   | 8    | 9    | 9    | 12   | 6    | 9.45  |
| 1994       | 4    | 7    | 7    | 9    | 8    | 8    | 4    | 6    | 6    | 6    | 6    | 6.45  |
| 1995       | 15   | 10   | 10   | 6    | 5    | 10   | 10   | 9    | 13   | 11   | 11   | 10.00 |
| 1996       | 17   | 9    | 10   | 5    | 10   | 11   | 11   | 12   | 12   | 11   | 13   | 11.00 |
| 1997       | 23   | 16   | 21   | 11   | 21   | 19   | 24   | 22   | 26   | 22   | 19   | 20.36 |
| 1998       | 12   | 15   | 12   | 7    | 13   | 13   | 15   | 19   | 19   | 22   | 19   | 15.09 |
| 1999       | 3    | 2    | 1    | 2    | 3    | 2    | 2    | 2    | 4    | 5    | 4    | 2.73  |
| 2000       | 2    | 10   | 6    | 4    | 2    | 5    | 2    | 8    | 7    | 5    | 1    | 4.73  |
| 2001       | 4    | 9    | 9    | 8    | 5    | 8    | 4    | 8    | 7    | 9    | 6    | 7.00  |
| 2002       | 6    | 4    | 3    | 3    | 5    | 5    | 5    | 4    | 6    | 7    | 8    | 5.09  |
| 2003       | 7    | 9    | 7    | 11   | 8    | 11   | 11   | 12   | 12   | 14   | 12   | 10.36 |
| 2004       | 7    | 4    | 10   | 11   | 13   | 10   | 6    | 4    | 8    | 9    | 6    | 8.00  |
| 2005       | 14   | 17   | 18   | 14   | 17   | 15   | 15   | 20   | 21   | 21   | 16   | 17.09 |
| 2006       | 4    | 5    | 8    | 7    | 8    | 6    | 4    | 8    | 7    | 8    | 5    | 6.36  |
| 2007       | 1    | 7    | 5    | 2    | 2    | 2    | 1    | 9    | 4    | 11   | 2    | 4.18  |
| 2008       | 0    | 8    | 1    | 7    | 1    | 3    | 2    | 5    | 4    | 13   | 6    | 4.55  |
| 2009       | 0    | 6    | 4    | 8    | 2    | 5    | 3    | 6    | 5    | 6    | 3    | 4.36  |
| 2010       | 4    | 3    | 2    | 1    | 1    | 2    | 0    | 2    | 1    | 2    | 0    | 1.64  |
| 2011       | 5    | 6    | 6    | 12   | 5    | 7    | 28   | 6    | 7    | 10   | 9    | 9.18  |
| 2012       | 2    | 6    | 6    | 3    | 6    | 3    | 21   | 7    | 6    | 8    | 8    | 6.91  |
| 2013       | 10   | 4    | 6    | 5    | 6    | 4    | 25   | 4    | 8    | 5    | 7    | 7.64  |
| 2014       | 2    | 1    | 1    | 1    | 1    | 0    | 16   | 1    | 4    | 4    | 2    | 3.00  |
| 2015       | 4    | 6    | 5    | 2    | 4    | 5    | 7    | 5    | 8    | 11   | 10   | 6.09  |
| 2016       | 3    | 5    | 7    | 5    | 4    | 6    | 2    | 3    | 3    | 10   | 3    | 4.64  |
| 2017       | 7    | 4    | 6    | 2    | 6    | 5    | 8    | 4    | 8    | 8    | 4    | 5.64  |
| 2018       | 7    | 4    | 5    | 5    | 5    | 3    | 3    | 3    | 3    | 4    | 3    | 4.09  |
| <b>Avg</b> | 8.94 | 8.84 | 8.94 | 8.90 | 9.26 | 8.96 | 9.07 | 8.99 | 9.01 | 9.01 | 8.99 |       |

**Table S6. 2.** Absolute and average number (avg) of Tn10 (days) for 11 stations in summer in Serbia from 1949 to 2018.

|      | BG | KG | KV | NE | LO | NI | NS | SP | SM | VG | ZR | avg   |
|------|----|----|----|----|----|----|----|----|----|----|----|-------|
| 1949 | 27 | 19 | 30 | 24 | 29 | 38 | 20 | 28 | 12 | 17 | 20 | 24.00 |

|      |    |    |    |    |    |    |    |    |    |    |    |       |
|------|----|----|----|----|----|----|----|----|----|----|----|-------|
| 1950 | 5  | 8  | 12 | 21 | 11 | 9  | 7  | 23 | 3  | 12 | 5  | 10.55 |
| 1951 | 5  | 5  | 3  | 7  | 6  | 5  | 9  | 4  | 4  | 5  | 8  | 5.55  |
| 1952 | 6  | 7  | 7  | 14 | 13 | 5  | 8  | 7  | 7  | 12 | 12 | 8.91  |
| 1953 | 9  | 8  | 6  | 15 | 8  | 2  | 8  | 5  | 4  | 5  | 9  | 7.18  |
| 1954 | 7  | 9  | 7  | 8  | 11 | 5  | 11 | 6  | 2  | 5  | 7  | 7.09  |
| 1955 | 7  | 5  | 6  | 2  | 9  | 6  | 6  | 4  | 7  | 0  | 5  | 5.18  |
| 1956 | 12 | 12 | 10 | 9  | 12 | 16 | 6  | 8  | 4  | 9  | 6  | 9.45  |
| 1957 | 8  | 9  | 5  | 4  | 10 | 5  | 8  | 8  | 3  | 7  | 7  | 6.73  |
| 1958 | 9  | 12 | 7  | 8  | 10 | 8  | 9  | 7  | 8  | 7  | 7  | 8.36  |
| 1959 | 3  | 4  | 5  | 2  | 5  | 3  | 2  | 3  | 2  | 2  | 0  | 2.82  |
| 1960 | 20 | 14 | 14 | 4  | 16 | 11 | 16 | 13 | 10 | 8  | 13 | 12.64 |
| 1961 | 14 | 22 | 21 | 16 | 18 | 15 | 19 | 19 | 13 | 10 | 21 | 17.09 |
| 1962 | 25 | 22 | 17 | 17 | 22 | 18 | 21 | 19 | 15 | 20 | 18 | 19.45 |
| 1963 | 5  | 5  | 4  | 7  | 7  | 5  | 2  | 7  | 3  | 3  | 6  | 4.91  |
| 1964 | 13 | 11 | 14 | 11 | 10 | 12 | 7  | 14 | 10 | 8  | 7  | 10.64 |
| 1965 | 20 | 23 | 19 | 21 | 22 | 18 | 13 | 20 | 16 | 14 | 14 | 18.18 |
| 1966 | 16 | 8  | 8  | 6  | 13 | 9  | 12 | 7  | 13 | 6  | 9  | 9.73  |
| 1967 | 8  | 6  | 6  | 7  | 7  | 10 | 9  | 12 | 8  | 7  | 8  | 8.00  |
| 1968 | 20 | 14 | 13 | 19 | 16 | 15 | 16 | 16 | 14 | 10 | 14 | 15.18 |
| 1969 | 14 | 10 | 15 | 7  | 14 | 14 | 13 | 7  | 10 | 5  | 11 | 10.91 |
| 1970 | 12 | 8  | 12 | 9  | 11 | 14 | 3  | 6  | 7  | 5  | 6  | 8.45  |
| 1971 | 11 | 12 | 8  | 14 | 11 | 6  | 13 | 12 | 10 | 10 | 17 | 11.27 |
| 1972 | 9  | 5  | 6  | 5  | 5  | 4  | 3  | 5  | 5  | 3  | 9  | 5.36  |
| 1973 | 11 | 12 | 15 | 10 | 15 | 14 | 10 | 11 | 8  | 7  | 15 | 11.64 |
| 1974 | 16 | 15 | 14 | 20 | 13 | 12 | 13 | 13 | 12 | 4  | 15 | 13.36 |
| 1975 | 11 | 7  | 7  | 6  | 4  | 6  | 4  | 4  | 4  | 3  | 6  | 5.64  |
| 1976 | 18 | 20 | 18 | 24 | 19 | 18 | 17 | 20 | 20 | 21 | 27 | 20.18 |
| 1977 | 8  | 6  | 8  | 9  | 12 | 9  | 5  | 12 | 10 | 7  | 13 | 9.00  |
| 1978 | 15 | 25 | 23 | 27 | 15 | 16 | 15 | 21 | 19 | 13 | 26 | 19.55 |
| 1979 | 10 | 9  | 10 | 10 | 13 | 10 | 9  | 9  | 10 | 9  | 14 | 10.27 |
| 1980 | 9  | 6  | 12 | 13 | 11 | 15 | 7  | 9  | 7  | 11 | 6  | 9.64  |
| 1981 | 15 | 8  | 11 | 15 | 13 | 10 | 9  | 8  | 9  | 5  | 10 | 10.27 |
| 1982 | 5  | 7  | 4  | 11 | 6  | 7  | 4  | 5  | 2  | 5  | 6  | 5.64  |
| 1983 | 10 | 13 | 9  | 12 | 12 | 13 | 7  | 11 | 9  | 11 | 7  | 10.36 |
| 1984 | 25 | 23 | 27 | 23 | 30 | 30 | 22 | 28 | 19 | 30 | 24 | 25.55 |
| 1985 | 14 | 18 | 18 | 20 | 14 | 19 | 16 | 17 | 13 | 16 | 23 | 17.09 |
| 1986 | 15 | 14 | 8  | 8  | 14 | 10 | 14 | 12 | 13 | 11 | 13 | 12.00 |
| 1987 | 12 | 13 | 14 | 14 | 16 | 12 | 14 | 13 | 19 | 16 | 15 | 14.36 |
| 1988 | 6  | 11 | 6  | 5  | 10 | 9  | 7  | 5  | 14 | 19 | 8  | 9.09  |
| 1989 | 13 | 10 | 14 | 12 | 12 | 19 | 10 | 9  | 11 | 14 | 12 | 12.36 |
| 1990 | 8  | 13 | 13 | 21 | 13 | 8  | 7  | 15 | 16 | 20 | 9  | 13.00 |
| 1991 | 1  | 3  | 3  | 2  | 5  | 6  | 4  | 3  | 7  | 4  | 5  | 3.91  |
| 1992 | 1  | 3  | 6  | 6  | 3  | 7  | 4  | 2  | 6  | 6  | 3  | 4.27  |
| 1993 | 16 | 10 | 19 | 14 | 19 | 17 | 15 | 14 | 20 | 19 | 15 | 16.18 |
| 1994 | 6  | 4  | 7  | 9  | 4  | 7  | 5  | 3  | 7  | 8  | 4  | 5.82  |
| 1995 | 3  | 1  | 2  | 1  | 2  | 2  | 1  | 1  | 3  | 5  | 2  | 2.09  |
| 1996 | 14 | 15 | 13 | 8  | 15 | 12 | 18 | 15 | 20 | 15 | 18 | 14.82 |
| 1997 | 7  | 3  | 2  | 6  | 2  | 6  | 1  | 2  | 6  | 5  | 3  | 3.91  |
| 1998 | 10 | 1  | 6  | 2  | 9  | 5  | 9  | 5  | 14 | 8  | 8  | 7.00  |
| 1999 | 4  | 5  | 4  | 3  | 8  | 4  | 7  | 4  | 8  | 8  | 3  | 5.27  |
| 2000 | 6  | 14 | 13 | 15 | 9  | 17 | 9  | 16 | 16 | 18 | 13 | 13.27 |

|            |      |      |      |      |      |      |      |      |      |      |      |      |
|------------|------|------|------|------|------|------|------|------|------|------|------|------|
| 2001       | 5    | 4    | 3    | 5    | 5    | 6    | 6    | 5    | 7    | 8    | 6    | 5.45 |
| 2002       | 0    | 0    | 0    | 0    | 0    | 0    | 2    | 2    | 1    | 3    | 2    | 0.91 |
| 2003       | 2    | 3    | 5    | 1    | 2    | 4    | 1    | 3    | 3    | 6    | 2    | 2.91 |
| 2004       | 3    | 4    | 1    | 6    | 3    | 3    | 3    | 2    | 4    | 6    | 4    | 3.55 |
| 2005       | 10   | 10   | 11   | 11   | 11   | 10   | 6    | 7    | 11   | 14   | 7    | 9.82 |
| 2006       | 12   | 7    | 11   | 5    | 10   | 5    | 4    | 10   | 10   | 9    | 8    | 8.27 |
| 2007       | 3    | 4    | 5    | 0    | 3    | 3    | 2    | 6    | 10   | 5    | 3    | 4.00 |
| 2008       | 2    | 3    | 4    | 0    | 1    | 2    | 3    | 3    | 7    | 6    | 3    | 3.09 |
| 2009       | 1    | 5    | 2    | 1    | 1    | 3    | 2    | 4    | 6    | 5    | 1    | 2.82 |
| 2010       | 1    | 1    | 1    | 0    | 1    | 0    | 0    | 1    | 1    | 3    | 0    | 0.82 |
| 2011       | 5    | 3    | 3    | 3    | 6    | 3    | 27   | 4    | 6    | 9    | 5    | 6.73 |
| 2012       | 0    | 3    | 3    | 1    | 2    | 1    | 13   | 10   | 8    | 15   | 7    | 5.73 |
| 2013       | 2    | 5    | 3    | 1    | 2    | 2    | 21   | 7    | 10   | 12   | 1    | 6.00 |
| 2014       | 1    | 7    | 2    | 3    | 3    | 3    | 24   | 4    | 7    | 7    | 3    | 5.82 |
| 2015       | 2    | 5    | 4    | 1    | 4    | 3    | 2    | 4    | 4    | 3    | 3    | 3.18 |
| 2016       | 2    | 4    | 5    | 2    | 2    | 2    | 2    | 4    | 6    | 5    | 2    | 3.27 |
| 2017       | 0    | 4    | 1    | 4    | 1    | 2    | 3    | 4    | 7    | 4    | 6    | 3.27 |
| 2018       | 4    | 2    | 2    | 2    | 3    | 2    | 3    | 2    | 5    | 3    | 5    | 3.00 |
| <b>Avg</b> | 8.99 | 8.87 | 8.96 | 8.99 | 9.63 | 8.96 | 8.97 | 8.99 | 8.93 | 9.01 | 9.00 |      |

**Table S6. 3.** Absolute and average number (avg) of Tn10 (days) for 11 stations in autumn in Serbia from 1949 to 2018.

|      | BG | KG | KV | NE | LO | NI | NS | SP | SM | VG | ZR | avg   |
|------|----|----|----|----|----|----|----|----|----|----|----|-------|
| 1949 | 3  | 3  | 7  | 13 | 6  | 9  | 5  | 12 | 4  | 8  | 6  | 6.91  |
| 1950 | 15 | 8  | 11 | 16 | 12 | 15 | 9  | 14 | 10 | 15 | 13 | 12.55 |
| 1951 | 5  | 11 | 10 | 16 | 10 | 5  | 17 | 12 | 8  | 12 | 5  | 10.09 |
| 1952 | 10 | 7  | 5  | 10 | 13 | 3  | 8  | 5  | 6  | 4  | 4  | 6.82  |
| 1953 | 18 | 21 | 19 | 13 | 21 | 19 | 19 | 19 | 20 | 21 | 17 | 18.82 |
| 1954 | 8  | 3  | 9  | 4  | 9  | 3  | 7  | 5  | 5  | 4  | 7  | 5.82  |
| 1955 | 2  | 2  | 2  | 0  | 5  | 1  | 1  | 2  | 1  | 1  | 2  | 1.73  |
| 1956 | 18 | 16 | 17 | 17 | 19 | 14 | 16 | 15 | 18 | 14 | 17 | 16.45 |
| 1957 | 6  | 6  | 3  | 2  | 8  | 2  | 3  | 4  | 3  | 1  | 4  | 3.82  |
| 1958 | 5  | 6  | 4  | 8  | 10 | 8  | 4  | 5  | 3  | 3  | 2  | 5.27  |
| 1959 | 25 | 22 | 20 | 27 | 21 | 22 | 27 | 22 | 18 | 22 | 24 | 22.73 |
| 1960 | 6  | 7  | 4  | 4  | 8  | 3  | 8  | 7  | 6  | 4  | 8  | 5.91  |
| 1961 | 5  | 14 | 15 | 10 | 13 | 15 | 11 | 16 | 11 | 4  | 26 | 12.73 |
| 1962 | 7  | 5  | 5  | 7  | 8  | 7  | 7  | 7  | 6  | 3  | 7  | 6.27  |
| 1963 | 3  | 4  | 6  | 6  | 4  | 3  | 3  | 3  | 5  | 2  | 5  | 4.00  |
| 1964 | 5  | 5  | 2  | 8  | 5  | 3  | 4  | 7  | 1  | 2  | 4  | 4.18  |
| 1965 | 17 | 16 | 18 | 17 | 17 | 18 | 18 | 18 | 20 | 19 | 16 | 17.64 |
| 1966 | 2  | 3  | 3  | 2  | 2  | 2  | 3  | 5  | 1  | 0  | 2  | 2.27  |
| 1967 | 4  | 7  | 5  | 5  | 6  | 5  | 9  | 6  | 4  | 5  | 8  | 5.82  |
| 1968 | 8  | 8  | 6  | 6  | 6  | 6  | 7  | 8  | 6  | 9  | 8  | 7.09  |
| 1969 | 7  | 9  | 11 | 13 | 7  | 14 | 3  | 11 | 7  | 7  | 7  | 8.73  |
| 1970 | 13 | 8  | 7  | 9  | 12 | 12 | 9  | 9  | 8  | 8  | 11 | 9.64  |
| 1971 | 20 | 12 | 20 | 9  | 19 | 12 | 14 | 14 | 15 | 11 | 18 | 14.91 |
| 1972 | 18 | 13 | 17 | 6  | 15 | 15 | 16 | 14 | 13 | 12 | 19 | 14.36 |
| 1973 | 16 | 19 | 18 | 24 | 16 | 18 | 17 | 16 | 17 | 14 | 22 | 17.91 |
| 1974 | 3  | 7  | 7  | 13 | 4  | 5  | 2  | 5  | 3  | 2  | 3  | 4.91  |
| 1975 | 6  | 7  | 6  | 6  | 4  | 7  | 4  | 4  | 5  | 5  | 5  | 5.36  |
| 1976 | 9  | 5  | 5  | 2  | 7  | 7  | 5  | 2  | 3  | 4  | 7  | 5.09  |

|            |      |      |      |      |      |      |      |      |      |      |      |       |
|------------|------|------|------|------|------|------|------|------|------|------|------|-------|
| 1977       | 13   | 9    | 10   | 9    | 10   | 10   | 8    | 10   | 12   | 11   | 12   | 10.36 |
| 1978       | 12   | 14   | 13   | 19   | 12   | 17   | 8    | 10   | 12   | 10   | 15   | 12.91 |
| 1979       | 13   | 12   | 16   | 14   | 15   | 11   | 10   | 14   | 15   | 9    | 11   | 12.73 |
| 1980       | 8    | 9    | 6    | 8    | 6    | 8    | 5    | 8    | 5    | 6    | 6    | 6.82  |
| 1981       | 6    | 1    | 3    | 4    | 2    | 7    | 5    | 2    | 3    | 2    | 4    | 3.55  |
| 1982       | 3    | 5    | 8    | 10   | 4    | 9    | 4    | 6    | 4    | 3    | 4    | 5.45  |
| 1983       | 19   | 18   | 17   | 22   | 20   | 19   | 20   | 17   | 17   | 17   | 18   | 18.55 |
| 1984       | 3    | 9    | 8    | 8    | 6    | 9    | 9    | 8    | 5    | 10   | 7    | 7.45  |
| 1985       | 12   | 11   | 11   | 15   | 10   | 10   | 12   | 10   | 8    | 9    | 13   | 11.00 |
| 1986       | 11   | 18   | 21   | 16   | 15   | 14   | 13   | 18   | 20   | 15   | 19   | 16.36 |
| 1987       | 11   | 8    | 8    | 8    | 9    | 6    | 9    | 8    | 9    | 7    | 8    | 8.27  |
| 1988       | 24   | 21   | 26   | 15   | 24   | 30   | 23   | 20   | 23   | 20   | 20   | 22.36 |
| 1989       | 14   | 16   | 18   | 10   | 16   | 17   | 13   | 13   | 18   | 15   | 12   | 14.73 |
| 1990       | 15   | 10   | 11   | 16   | 16   | 12   | 14   | 13   | 16   | 9    | 13   | 13.18 |
| 1991       | 13   | 8    | 8    | 11   | 13   | 9    | 15   | 9    | 17   | 12   | 12   | 11.55 |
| 1992       | 5    | 10   | 8    | 7    | 12   | 9    | 8    | 8    | 13   | 12   | 8    | 9.09  |
| 1993       | 20   | 15   | 19   | 22   | 10   | 18   | 17   | 16   | 15   | 13   | 16   | 16.45 |
| 1994       | 9    | 6    | 3    | 5    | 7    | 6    | 6    | 6    | 6    | 8    | 8    | 6.36  |
| 1995       | 18   | 17   | 13   | 15   | 16   | 17   | 16   | 14   | 20   | 23   | 16   | 16.82 |
| 1996       | 8    | 5    | 7    | 4    | 4    | 4    | 8    | 5    | 7    | 6    | 5    | 5.73  |
| 1997       | 15   | 17   | 13   | 17   | 17   | 21   | 16   | 18   | 19   | 26   | 18   | 17.91 |
| 1998       | 6    | 4    | 2    | 6    | 9    | 4    | 4    | 2    | 7    | 8    | 5    | 5.18  |
| 1999       | 3    | 4    | 3    | 3    | 2    | 5    | 1    | 1    | 3    | 6    | 3    | 3.09  |
| 2000       | 2    | 7    | 7    | 5    | 3    | 7    | 4    | 5    | 8    | 8    | 6    | 5.64  |
| 2001       | 7    | 6    | 8    | 7    | 6    | 7    | 6    | 7    | 6    | 10   | 5    | 6.82  |
| 2002       | 5    | 4    | 6    | 1    | 8    | 1    | 4    | 5    | 8    | 9    | 4    | 5.00  |
| 2003       | 8    | 8    | 10   | 4    | 11   | 7    | 6    | 9    | 8    | 5    | 5    | 7.36  |
| 2004       | 3    | 6    | 5    | 6    | 5    | 4    | 4    | 6    | 6    | 5    | 6    | 5.09  |
| 2005       | 1    | 5    | 4    | 1    | 1    | 6    | 3    | 4    | 5    | 7    | 4    | 3.73  |
| 2006       | 5    | 9    | 6    | 4    | 6    | 7    | 5    | 9    | 4    | 6    | 7    | 6.18  |
| 2007       | 10   | 7    | 11   | 8    | 10   | 8    | 9    | 9    | 12   | 11   | 10   | 9.55  |
| 2008       | 5    | 3    | 4    | 2    | 3    | 3    | 3    | 3    | 6    | 5    | 3    | 3.64  |
| 2009       | 4    | 3    | 3    | 2    | 4    | 2    | 2    | 2    | 3    | 4    | 3    | 2.91  |
| 2010       | 4    | 6    | 7    | 8    | 6    | 9    | 8    | 7    | 10   | 9    | 7    | 7.36  |
| 2011       | 15   | 16   | 16   | 20   | 13   | 14   | 20   | 18   | 11   | 25   | 12   | 16.36 |
| 2012       | 1    | 2    | 2    | 2    | 3    | 4    | 7    | 3    | 3    | 5    | 1    | 3.00  |
| 2013       | 5    | 13   | 8    | 6    | 6    | 7    | 17   | 8    | 8    | 11   | 8    | 8.82  |
| 2014       | 1    | 2    | 0    | 0    | 0    | 0    | 8    | 2    | 0    | 1    | 0    | 1.27  |
| 2015       | 1    | 5    | 7    | 1    | 6    | 4    | 5    | 7    | 5    | 7    | 4    | 4.73  |
| 2016       | 6    | 8    | 4    | 2    | 6    | 4    | 4    | 9    | 11   | 11   | 3    | 6.18  |
| 2017       | 0    | 3    | 1    | 1    | 3    | 0    | 0    | 3    | 1    | 4    | 0    | 1.45  |
| 2018       | 6    | 9    | 5    | 5    | 6    | 4    | 5    | 8    | 8    | 9    | 6    | 6.45  |
| <b>Avg</b> | 8.77 | 8.90 | 8.97 | 8.89 | 9.26 | 8.90 | 8.86 | 8.96 | 8.91 | 8.93 | 8.91 |       |

**Table S6. 4.** Absolute and average number (avg) of Tn10 (days) for 11 stations in winter in Serbia from 1949 to 2017.

|      | BG | KG | KV | NE | LO | NI | NS | SP | SM | VG | ZR | avg   |
|------|----|----|----|----|----|----|----|----|----|----|----|-------|
| 1949 | 15 | 14 | 13 | 18 | 16 | 18 | 16 | 13 | 14 | 9  | 14 | 14.55 |
| 1950 | 0  | 0  | 0  | 1  | 0  | 0  | 0  | 0  | 0  | 1  | 0  | 0.18  |
| 1951 | 2  | 2  | 5  | 2  | 3  | 2  | 2  | 4  | 1  | 2  | 2  | 2.45  |
| 1952 | 6  | 3  | 4  | 0  | 8  | 3  | 6  | 3  | 7  | 2  | 4  | 4.18  |
| 1953 | 39 | 34 | 36 | 30 | 40 | 37 | 37 | 32 | 38 | 29 | 43 | 35.91 |
| 1954 | 0  | 3  | 1  | 2  | 1  | 2  | 2  | 0  | 1  | 0  | 2  | 1.27  |
| 1955 | 25 | 21 | 20 | 25 | 25 | 19 | 22 | 20 | 22 | 20 | 24 | 22.09 |
| 1956 | 6  | 4  | 6  | 6  | 8  | 1  | 3  | 4  | 4  | 3  | 2  | 4.27  |
| 1957 | 14 | 10 | 7  | 15 | 13 | 9  | 15 | 9  | 14 | 10 | 11 | 11.55 |
| 1958 | 15 | 9  | 7  | 16 | 14 | 7  | 10 | 16 | 10 | 9  | 11 | 11.27 |
| 1959 | 12 | 11 | 13 | 9  | 11 | 10 | 12 | 10 | 12 | 13 | 14 | 11.55 |
| 1960 | 5  | 5  | 6  | 3  | 5  | 6  | 2  | 2  | 3  | 2  | 3  | 3.82  |
| 1961 | 14 | 11 | 11 | 6  | 7  | 11 | 8  | 6  | 6  | 9  | 11 | 9.09  |
| 1962 | 36 | 33 | 35 | 26 | 37 | 28 | 35 | 28 | 33 | 26 | 32 | 31.73 |
| 1963 | 25 | 14 | 14 | 7  | 21 | 15 | 27 | 22 | 20 | 16 | 29 | 19.09 |
| 1964 | 13 | 11 | 12 | 6  | 13 | 13 | 15 | 10 | 13 | 13 | 16 | 12.27 |
| 1965 | 4  | 5  | 9  | 5  | 5  | 7  | 5  | 7  | 4  | 6  | 4  | 5.55  |
| 1966 | 10 | 17 | 14 | 14 | 13 | 13 | 13 | 17 | 10 | 12 | 11 | 13.09 |
| 1967 | 14 | 16 | 11 | 9  | 13 | 10 | 14 | 17 | 13 | 16 | 14 | 13.36 |
| 1968 | 16 | 11 | 9  | 17 | 11 | 12 | 17 | 17 | 14 | 12 | 17 | 13.91 |
| 1969 | 9  | 10 | 11 | 5  | 12 | 6  | 11 | 7  | 10 | 9  | 7  | 8.82  |
| 1970 | 3  | 1  | 3  | 1  | 5  | 2  | 6  | 5  | 5  | 2  | 9  | 3.82  |
| 1971 | 7  | 1  | 3  | 11 | 2  | 5  | 3  | 2  | 3  | 3  | 3  | 3.91  |
| 1972 | 3  | 8  | 6  | 13 | 5  | 6  | 1  | 7  | 2  | 3  | 3  | 5.18  |
| 1973 | 6  | 9  | 12 | 8  | 9  | 10 | 6  | 9  | 9  | 8  | 6  | 8.36  |
| 1974 | 0  | 2  | 4  | 3  | 1  | 2  | 2  | 5  | 1  | 2  | 2  | 2.18  |
| 1975 | 4  | 7  | 8  | 7  | 4  | 7  | 2  | 6  | 5  | 8  | 5  | 5.73  |
| 1976 | 3  | 4  | 2  | 10 | 3  | 3  | 3  | 2  | 5  | 4  | 4  | 3.91  |
| 1977 | 14 | 8  | 10 | 20 | 16 | 10 | 10 | 8  | 11 | 11 | 13 | 11.91 |
| 1978 | 12 | 14 | 11 | 11 | 13 | 16 | 10 | 13 | 12 | 13 | 13 | 12.55 |
| 1979 | 5  | 7  | 3  | 10 | 5  | 8  | 5  | 6  | 5  | 11 | 5  | 6.36  |
| 1980 | 12 | 13 | 10 | 8  | 12 | 12 | 13 | 10 | 9  | 17 | 12 | 11.64 |
| 1981 | 6  | 8  | 11 | 5  | 7  | 6  | 5  | 5  | 4  | 4  | 6  | 6.09  |
| 1982 | 4  | 2  | 3  | 2  | 3  | 6  | 2  | 6  | 1  | 6  | 4  | 3.55  |
| 1983 | 10 | 5  | 7  | 4  | 7  | 3  | 6  | 5  | 6  | 2  | 10 | 5.91  |
| 1984 | 32 | 28 | 28 | 29 | 29 | 28 | 33 | 28 | 30 | 28 | 38 | 30.09 |
| 1985 | 4  | 5  | 6  | 8  | 5  | 5  | 5  | 5  | 6  | 4  | 6  | 5.36  |
| 1986 | 12 | 12 | 13 | 6  | 14 | 15 | 7  | 10 | 14 | 11 | 11 | 11.36 |
| 1987 | 3  | 2  | 3  | 1  | 4  | 4  | 4  | 3  | 6  | 3  | 3  | 3.27  |
| 1988 | 2  | 4  | 4  | 1  | 2  | 3  | 1  | 5  | 4  | 3  | 3  | 2.91  |
| 1989 | 14 | 16 | 15 | 13 | 11 | 17 | 9  | 14 | 13 | 12 | 10 | 13.09 |
| 1990 | 6  | 5  | 7  | 8  | 9  | 9  | 10 | 7  | 12 | 9  | 7  | 8.09  |
| 1991 | 5  | 12 | 10 | 7  | 9  | 12 | 7  | 14 | 8  | 17 | 7  | 9.82  |
| 1992 | 18 | 20 | 20 | 17 | 18 | 16 | 12 | 16 | 12 | 24 | 13 | 16.91 |
| 1993 | 4  | 2  | 5  | 12 | 8  | 1  | 6  | 2  | 8  | 2  | 3  | 4.82  |
| 1994 | 4  | 5  | 6  | 6  | 3  | 4  | 3  | 6  | 3  | 6  | 5  | 4.64  |
| 1995 | 0  | 2  | 3  | 8  | 6  | 4  | 4  | 2  | 4  | 2  | 3  | 3.45  |
| 1996 | 7  | 5  | 5  | 5  | 6  | 5  | 7  | 5  | 8  | 6  | 7  | 6.00  |

---

|            |      |      |      |      |      |      |      |      |      |      |      |       |
|------------|------|------|------|------|------|------|------|------|------|------|------|-------|
| 1997       | 3    | 1    | 5    | 6    | 2    | 3    | 1    | 1    | 1    | 4    | 1    | 2.55  |
| 1998       | 13   | 15   | 10   | 11   | 11   | 14   | 14   | 14   | 15   | 13   | 14   | 13.09 |
| 1999       | 7    | 5    | 7    | 4    | 8    | 8    | 10   | 9    | 12   | 7    | 7    | 7.64  |
| 2000       | 1    | 3    | 1    | 2    | 3    | 3    | 4    | 3    | 4    | 2    | 5    | 2.82  |
| 2001       | 11   | 11   | 16   | 7    | 16   | 18   | 15   | 15   | 20   | 18   | 11   | 14.36 |
| 2002       | 17   | 14   | 10   | 14   | 10   | 12   | 22   | 11   | 21   | 12   | 19   | 14.73 |
| 2003       | 5    | 7    | 5    | 4    | 8    | 4    | 4    | 13   | 9    | 12   | 7    | 7.09  |
| 2004       | 8    | 9    | 7    | 7    | 9    | 8    | 11   | 10   | 10   | 8    | 9    | 8.73  |
| 2005       | 7    | 10   | 12   | 8    | 6    | 12   | 5    | 8    | 6    | 10   | 8    | 8.36  |
| 2006       | 0    | 0    | 0    | 0    | 0    | 0    | 0    | 0    | 0    | 0    | 0    | 0.00  |
| 2007       | 2    | 5    | 4    | 11   | 4    | 6    | 2    | 6    | 3    | 5    | 4    | 4.73  |
| 2008       | 6    | 9    | 8    | 12   | 6    | 8    | 4    | 9    | 7    | 14   | 9    | 8.36  |
| 2009       | 7    | 5    | 7    | 12   | 8    | 7    | 7    | 7    | 7    | 7    | 7    | 7.36  |
| 2010       | 11   | 11   | 6    | 13   | 6    | 9    | 13   | 11   | 9    | 15   | 11   | 10.45 |
| 2011       | 17   | 19   | 17   | 17   | 17   | 21   | 21   | 17   | 15   | 16   | 11   | 17.09 |
| 2012       | 4    | 3    | 3    | 3    | 4    | 5    | 9    | 3    | 4    | 4    | 4    | 4.18  |
| 2013       | 1    | 4    | 2    | 1    | 0    | 2    | 5    | 2    | 1    | 3    | 1    | 2.00  |
| 2014       | 3    | 8    | 6    | 6    | 5    | 8    | 5    | 7    | 4    | 7    | 4    | 5.73  |
| 2015       | 4    | 7    | 7    | 9    | 3    | 8    | 1    | 7    | 5    | 8    | 1    | 5.45  |
| 2016       | 10   | 22   | 20   | 17   | 15   | 16   | 11   | 16   | 13   | 16   | 6    | 14.73 |
| 2017       | 4    | 3    | 3    | 2    | 3    | 3    | 2    | 3    | 3    | 2    | 1    | 2.64  |
| <b>avg</b> | 9.00 | 9.01 | 8.96 | 9.01 | 9.22 | 9.03 | 8.99 | 9.01 | 9.04 | 9.03 | 9.01 |       |

---
